# Supplementary material for: A positive association between nutritional risk and the incidence of surgical site infections: A hospital-based register study
Source: PLoS One. 2018 May 15;13(5):e0197344. doi: 10.1371/journal.pone.0197344 (PMC5953435; doi:10.1371/journal.pone.0197344)
Supplement: S1 File — The data set is anonymized and has grouped the age and type of surgery variables. Replicated results may thus in some degree differ from what is reported in the manuscript. (XLS) [file pone.0197344.s001.xls]

## Sheet: Nut.risk and SSI_Skeie
Gender	Age_intervals	AcuteSurgery	ASA_Score	BMI	WeightLoss	ReducedDietaryIntake	Severely_ill	Missing_InitialScreening	InitialScreening	Score_ImpairedNutritionalStatus	Score_SeverityOfDisease	FinalScreening_Score	Missing_FinalScreening	NutritionalRisk	SSI_within30d	Deep_SSI	MainOrgan_NMSCCSP
1	4	1	3	22.3958	0	0	1	0	1	0	1	1	0	0	1	1	4
0	11	0	3	25.2826	1	1	0	0	1	2	1	4	0	1	1	1	3
0	6	0	2	30.4705	0	0	0	0	0	0	#NULL!	#NULL!	1	0	1	1	3
0	11	0	2	32.4219	0	0	0	0	0	#NULL!	#NULL!	#NULL!	1	0	1	1	1
0	11	0	3	44.5312	0	1	0	0	1	2	2	5	0	1	1	1	1
0	8	0	3	20.6575	0	0	0	0	0	0	#NULL!	#NULL!	1	0	1	1	1
0	14	0	2	21.4536	0	1	0	0	1	0	1	2	0	0	1	1	1
0	9	0	2	23.088	0	1	0	0	1	1	1	2	0	0	1	1	1
0	5	0	1	24.2215	0	0	0	0	0	#NULL!	#NULL!	#NULL!	1	0	1	1	3
1	10	0	3	24.6019	0	0	0	0	0	#NULL!	#NULL!	#NULL!	1	0	1	1	1
0	5	0	1	24.7409	0	0	0	0	0	#NULL!	#NULL!	#NULL!	1	0	1	1	3
0	14	1	3	19.6484	0	0	0	0	1	2	2	5	0	1	1	1	1
1	7	0	1	25.0298	0	0	0	0	0	#NULL!	#NULL!	#NULL!	1	0	1	1	4
0	13	0	3	25.3906	0	0	0	0	0	#NULL!	#NULL!	#NULL!	1	0	1	1	4
1	9	0	1	26.3158	0	0	0	0	0	#NULL!	#NULL!	#NULL!	1	0	1	1	4
0	5	0	2	31.2452	0	0	0	0	0	#NULL!	#NULL!	#NULL!	1	0	1	1	3
0	13	0	3	32.8125	0	0	0	0	0	#NULL!	#NULL!	#NULL!	1	0	1	1	1
0	11	0	2	24.0346	0	0	0	0	0	#NULL!	#NULL!	#NULL!	1	0	1	1	1
1	12	1	2	24.8356	0	0	0	0	0	#NULL!	#NULL!	#NULL!	1	0	1	1	4
1	8	0	2	22.0761	1	1	0	0	1	2	1	3	0	1	1	1	1
0	13	0	2	23.7387	0	1	0	0	1	1	2	4	0	1	1	1	1
1	8	0	2	25.344	0	0	0	0	0	#NULL!	#NULL!	#NULL!	1	0	1	1	1
1	7	0	3	26.2346	0	0	1	0	1	0	1	1	0	0	1	1	2
0	8	0	2	26.4915	1	1	1	0	1	0	2	2	0	0	1	1	1
0	7	0	3	27.0416	0	0	0	0	0	0	#NULL!	#NULL!	1	0	1	1	3
0	9	0	3	27.0416	0	0	0	0	0	#NULL!	#NULL!	#NULL!	1	0	1	1	1
0	13	0	2	27.4077	0	0	0	0	0	0	#NULL!	#NULL!	1	0	1	1	1
0	9	1	3	29.5317	0	0	0	0	0	#NULL!	#NULL!	#NULL!	1	0	1	1	1
1	12	0	2	29.3878	0	1	0	0	1	2	2	5	0	1	1	1	1
1	10	1	3	30.6689	0	0	0	0	0	0	#NULL!	#NULL!	1	0	1	1	1
0	10	0	3	32.4662	0	0	0	0	0	#NULL!	#NULL!	#NULL!	1	0	1	1	1
1	10	0	2	33.771	1	1	0	0	1	2	2	5	0	1	1	1	1
0	12	1	2	18.0662	1	1	0	0	1	3	1	5	0	1	1	1	1
1	12	0	2	20.9024	0	0	0	0	0	#NULL!	#NULL!	#NULL!	1	0	1	1	1
1	10	0	2	21.1833	1	1	0	0	1	1	1	2	0	0	1	1	1
1	12	0	3	22.7147	0	0	0	0	0	#NULL!	#NULL!	#NULL!	1	0	1	1	1
1	8	0	3	22.7903	0	0	0	0	0	#NULL!	#NULL!	#NULL!	1	0	1	1	1
1	10	0	3	22.7903	1	1	1	0	1	1	1	2	0	0	1	1	2
1	1	0	3	22.7904	0	0	0	0	0	#NULL!	#NULL!	#NULL!	1	0	1	1	1
1	3	0	1	19.2653	1	1	0	0	1	2	1	3	0	1	1	1	1
0	10	0	3	20.1995	0	1	0	0	1	2	1	3	0	1	1	1	1
1	12	0	2	21.3673	1	1	0	0	1	1	1	3	0	1	1	1	1
0	10	0	1	21.4508	1	1	0	0	1	1	2	3	0	1	1	1	1
1	7	1	2	22.903	1	0	0	0	1	2	1	3	0	1	1	1	1
1	8	1	2	27.1314	0	1	0	0	1	1	1	2	0	0	1	1	1
0	12	0	2	27.6888	0	0	0	0	0	#NULL!	#NULL!	#NULL!	1	0	1	1	1
0	8	0	2	28.1943	0	0	0	0	0	0	#NULL!	#NULL!	1	0	1	1	3
0	9	0	2	27.5134	0	0	1	0	1	3	2	5	0	1	1	1	3
1	7	0	3	38.4168	0	0	1	0	1	0	2	2	0	0	1	1	2
1	8	1	3	32.7442	1	1	0	0	1	3	2	5	0	1	1	1	1
1	8	0	3	36.0111	0	1	1	0	1	2	1	3	0	1	1	1	1
0	12	1	3	#NULL!	0	0	1	1	1	0	2	3	0	1	0	0	4
0	15	1	3	#NULL!	#NULL!	1	#NULL!	1	1	2	1	4	0	1	0	0	4
1	9	1	3	#NULL!	1	1	0	1	1	3	1	4	0	1	0	0	4
1	12	0	3	#NULL!	0	1	0	1	1	3	2	6	0	1	0	0	1
0	13	0	3	15.1111	0	0	0	0	1	3	2	6	0	1	0	0	4
0	13	1	3	15.3787	1	1	0	0	1	3	1	5	0	1	0	0	1
0	13	1	2	15.4959	1	1	0	0	1	3	2	6	0	1	0	0	4
0	12	1	2	16.1843	0	0	0	0	1	3	1	5	0	1	0	0	4
0	10	1	3	16.3147	1	1	0	0	1	3	2	5	0	1	0	0	1
0	13	1	3	16.8525	1	1	0	0	1	3	1	5	0	1	0	0	1
1	9	0	2	16.9753	0	0	0	0	1	3	1	4	0	1	0	0	1
0	1	0	1	17.2635	0	0	0	0	1	3	0	3	0	1	0	0	4
1	12	1	2	17.284	1	1	1	0	1	3	1	5	0	1	1	0	4
0	14	1	3	17.5781	0	0	0	0	1	3	1	5	0	1	0	0	4
0	12	0	2	17.698	0	1	0	0	1	3	2	6	0	1	0	0	1
1	14	1	3	17.9163	0	1	0	0	1	3	0	4	0	1	0	0	4
1	14	1	2	17.9982	1	1	1	0	1	3	0	4	0	1	0	0	4
1	9	0	2	18.0697	0	0	0	0	1	3	0	3	0	1	0	0	1
0	12	1	3	18.1449	1	1	0	0	1	3	1	5	0	1	0	0	4
0	15	0	3	18.1449	0	0	1	0	1	3	2	6	0	1	0	0	1
0	15	1	3	18.2663	0	0	0	0	1	3	0	4	0	1	0	0	4
1	13	0	3	18.3391	1	0	0	0	1	3	1	5	0	1	0	0	1
1	11	0	2	18.4451	0	0	0	0	1	3	#NULL!	#NULL!	1	1	0	0	4
0	10	0	2	24.9991	0	0	0	0	0	#NULL!	#NULL!	#NULL!	1	0	0	0	4
1	7	0	2	24.9153	0	0	0	0	0	#NULL!	#NULL!	#NULL!	1	0	0	0	4
1	10	0	2	24.968	0	0	0	0	0	#NULL!	#NULL!	#NULL!	1	0	0	0	4
0	9	0	3	24.977	0	0	0	0	0	#NULL!	#NULL!	#NULL!	1	0	0	0	1
0	9	0	#NULL!	24.977	0	0	0	0	0	#NULL!	#NULL!	#NULL!	1	0	0	0	1
0	4	0	2	24.977	0	0	0	0	0	#NULL!	#NULL!	#NULL!	1	0	0	0	1
1	4	0	1	19.4444	0	0	0	0	1	2	0	2	0	0	0	0	4
1	8	0	2	20.0692	1	0	0	0	1	2	0	2	0	0	0	0	4
1	2	0	3	20.5289	0	0	0	0	0	2	#NULL!	#NULL!	1	0	0	0	4
1	14	0	3	20.5714	0	0	0	0	0	#NULL!	#NULL!	#NULL!	1	0	0	0	4
0	5	0	1	20.5714	0	1	0	0	1	2	0	2	0	0	0	0	4
1	10	0	3	20.6434	0	0	0	0	0	#NULL!	#NULL!	#NULL!	1	0	0	0	2
1	13	1	3	20.6612	0	0	0	0	0	#NULL!	#NULL!	#NULL!	1	0	0	0	4
0	3	1	2	20.7385	1	1	0	0	1	0	1	1	0	0	0	0	1
0	12	0	4	20.7967	0	0	0	0	0	#NULL!	#NULL!	#NULL!	1	0	0	0	2
0	5	0	2	20.889	0	0	0	0	0	#NULL!	#NULL!	#NULL!	1	0	0	0	3
1	10	0	1	20.9877	0	0	0	0	0	#NULL!	#NULL!	#NULL!	1	0	0	0	4
0	13	1	2	21.0077	0	0	0	0	0	#NULL!	#NULL!	#NULL!	1	0	0	0	4
1	9	0	3	21.0503	0	0	0	0	0	#NULL!	#NULL!	#NULL!	1	0	1	0	2
0	15	0	2	21.0937	0	0	0	0	0	#NULL!	#NULL!	#NULL!	1	0	0	0	1
0	13	1	2	21.0962	0	0	0	0	0	#NULL!	#NULL!	#NULL!	1	0	0	0	4
0	9	0	4	21.1553	0	0	1	0	1	0	0	0	0	0	0	0	2
1	11	0	3	21.2245	0	0	0	0	0	#NULL!	#NULL!	#NULL!	1	0	0	0	1
1	6	1	2	21.2963	1	1	0	0	1	1	1	2	0	0	1	0	1
0	4	0	2	21.3068	0	0	0	0	0	#NULL!	#NULL!	#NULL!	1	0	0	0	1
0	11	1	3	21.4413	0	0	0	0	0	#NULL!	#NULL!	#NULL!	1	0	0	0	1
0	7	0	1	21.4533	0	0	0	0	0	#NULL!	#NULL!	#NULL!	1	0	0	0	4
1	13	0	2	21.4619	0	0	0	0	0	#NULL!	#NULL!	#NULL!	1	0	0	0	4
0	11	0	3	21.6333	0	0	0	0	0	#NULL!	#NULL!	#NULL!	1	0	0	0	1
0	13	1	2	21.7738	1	1	0	0	1	0	1	2	0	0	0	0	4
0	9	0	2	21.7738	0	0	0	0	0	#NULL!	#NULL!	#NULL!	1	0	1	0	1
1	8	0	3	21.7982	0	0	0	0	0	#NULL!	#NULL!	#NULL!	1	0	0	0	2
0	13	0	2	21.7993	0	0	0	0	0	#NULL!	#NULL!	#NULL!	1	0	0	0	1
0	12	0	2	21.83	0	0	0	0	0	#NULL!	#NULL!	#NULL!	1	0	0	0	4
1	7	0	2	21.8647	1	0	0	0	1	0	1	1	0	0	0	0	1
1	9	0	3	21.8724	0	1	0	0	1	1	0	1	0	0	0	0	2
1	12	0	3	21.9679	0	0	1	0	1	0	1	2	0	0	0	0	2
1	8	0	4	22.0243	1	0	1	0	1	0	1	1	0	0	0	0	2
0	14	0	3	22.0386	0	0	0	0	0	#NULL!	#NULL!	#NULL!	1	0	0	0	4
1	8	0	2	22.0522	0	0	0	0	0	#NULL!	#NULL!	#NULL!	1	0	0	0	4
0	12	0	3	22.1893	0	0	0	0	0	#NULL!	#NULL!	#NULL!	1	0	0	0	3
0	13	1	3	22.2063	0	0	0	0	0	#NULL!	#NULL!	#NULL!	1	0	0	0	4
0	10	0	2	22.2291	0	0	0	0	0	0	#NULL!	#NULL!	1	0	0	0	4
1	12	0	3	22.3435	1	1	1	0	1	0	1	2	0	0	0	0	2
0	3	1	3	22.3825	1	1	0	0	1	0	1	1	0	0	0	0	1
1	5	0	1	22.3863	0	0	0	0	0	#NULL!	#NULL!	#NULL!	1	0	0	0	1
0	3	0	1	22.4632	0	0	0	0	0	0	#NULL!	#NULL!	1	0	0	0	1
1	9	0	3	22.4912	0	0	1	0	1	0	2	2	0	0	0	0	2
0	12	1	2	22.4913	0	0	0	0	0	#NULL!	#NULL!	#NULL!	1	0	0	0	4
0	6	0	3	22.5306	0	0	0	0	0	#NULL!	#NULL!	#NULL!	1	0	1	0	1
1	12	0	2	22.571	0	0	0	0	0	#NULL!	#NULL!	#NULL!	1	0	0	0	1
0	13	0	3	22.5827	0	0	0	0	0	2	#NULL!	#NULL!	1	0	0	0	4
1	14	1	2	22.5827	0	0	0	0	0	0	#NULL!	#NULL!	1	0	0	0	1
0	14	0	2	22.6003	0	0	0	0	0	#NULL!	#NULL!	#NULL!	1	0	0	0	1
1	12	0	3	22.6252	0	0	0	0	0	0	#NULL!	#NULL!	1	0	0	0	2
0	13	0	3	22.6326	0	0	1	0	1	0	1	2	0	0	0	0	2
0	9	0	3	22.6562	0	0	1	0	1	0	1	1	0	0	1	0	2
0	12	1	2	22.8374	0	0	0	0	0	#NULL!	#NULL!	#NULL!	1	0	0	0	4
1	14	1	2	22.8911	0	0	0	0	0	#NULL!	#NULL!	#NULL!	1	0	0	0	4
1	4	0	3	22.9394	0	0	1	0	1	0	2	2	0	0	0	0	2
1	12	0	3	22.9819	0	0	1	0	1	0	1	2	0	0	0	0	2
0	5	0	2	22.9854	0	0	0	0	0	#NULL!	#NULL!	#NULL!	1	0	0	0	4
1	14	0	3	22.9926	1	1	0	0	1	0	1	2	0	0	1	0	1
0	10	0	2	23.03	0	0	0	0	0	#NULL!	#NULL!	#NULL!	1	0	1	0	4
1	12	0	3	23.1834	1	1	1	0	1	0	1	2	0	0	0	0	2
0	7	0	2	23.1837	0	0	0	0	0	#NULL!	#NULL!	#NULL!	1	0	0	0	4
0	14	0	2	23.2335	0	0	0	0	0	0	#NULL!	#NULL!	1	0	0	0	4
1	4	0	2	23.2356	0	0	0	0	0	#NULL!	#NULL!	#NULL!	1	0	0	0	1
1	13	0	3	23.255	0	0	0	0	0	#NULL!	#NULL!	#NULL!	1	0	0	0	1
1	6	0	3	23.3143	0	0	0	0	0	#NULL!	#NULL!	#NULL!	1	0	0	0	1
1	10	0	3	23.3341	0	0	1	0	1	0	1	1	0	0	0	0	2
0	12	1	3	23.3355	0	0	0	0	0	#NULL!	#NULL!	#NULL!	1	0	0	0	4
1	10	1	3	23.3556	0	0	1	0	1	0	1	1	0	0	0	0	2
0	11	0	3	23.3844	0	0	0	0	0	#NULL!	#NULL!	#NULL!	1	0	0	0	1
0	9	0	2	23.4221	0	0	0	0	0	#NULL!	#NULL!	#NULL!	1	0	0	0	4
0	11	0	2	23.4221	0	0	0	0	0	#NULL!	#NULL!	#NULL!	1	0	0	0	4
0	13	1	4	23.4375	0	0	0	0	0	#NULL!	#NULL!	#NULL!	1	0	0	0	4
1	12	0	3	23.4586	0	1	1	0	1	0	1	2	0	0	0	0	2
0	13	1	2	23.5078	0	0	0	0	0	#NULL!	#NULL!	#NULL!	1	0	0	0	4
1	13	0	2	23.5262	0	0	0	0	0	#NULL!	#NULL!	#NULL!	1	0	0	0	4
1	8	0	2	23.5457	0	0	0	0	0	#NULL!	#NULL!	#NULL!	1	0	0	0	4
1	9	0	3	23.6652	0	0	1	0	1	0	1	1	0	0	0	0	2
0	7	0	#NULL!	23.7228	0	0	0	0	0	#NULL!	#NULL!	#NULL!	1	0	0	0	4
0	8	0	1	23.7388	0	0	0	0	0	#NULL!	#NULL!	#NULL!	1	0	0	0	1
1	11	0	3	23.7799	1	0	0	0	1	0	1	2	0	0	0	0	1
0	15	1	3	23.8751	0	0	0	0	0	#NULL!	#NULL!	#NULL!	1	0	0	0	4
1	11	0	3	23.8895	0	0	0	0	0	#NULL!	#NULL!	#NULL!	1	0	0	0	2
1	12	0	2	23.8895	0	0	0	0	0	#NULL!	#NULL!	#NULL!	1	0	0	0	4
1	11	0	2	23.9217	0	0	0	0	0	#NULL!	#NULL!	#NULL!	1	0	0	0	1
1	13	0	3	23.939	0	0	0	0	0	#NULL!	#NULL!	#NULL!	1	0	0	0	1
0	9	0	2	23.939	0	0	0	0	0	#NULL!	#NULL!	#NULL!	1	0	0	0	4
1	7	0	1	23.9869	0	0	0	0	0	#NULL!	#NULL!	#NULL!	1	0	0	0	4
0	11	0	2	24.0238	0	0	0	0	0	#NULL!	#NULL!	#NULL!	1	0	0	0	4
1	10	0	3	24.0238	0	0	1	0	1	0	1	1	0	0	0	0	2
0	14	0	3	24.0346	0	0	0	0	0	#NULL!	#NULL!	#NULL!	1	0	0	0	4
1	4	0	1	24.0741	0	0	0	0	0	#NULL!	#NULL!	#NULL!	1	0	0	0	4
1	9	0	2	24.0755	1	1	0	0	1	2	0	2	0	0	0	0	1
0	8	0	2	24.093	0	1	0	0	1	0	1	1	0	0	0	0	1
1	12	0	3	24.093	0	0	1	0	1	0	1	2	0	0	0	0	2
1	13	0	3	24.1115	0	0	1	0	1	0	1	2	0	0	0	0	2
1	11	0	3	24.1517	1	0	1	0	1	0	1	2	0	0	0	0	2
1	12	0	3	24.2123	0	0	1	0	1	0	1	2	0	0	0	0	2
1	11	0	2	24.2202	0	0	0	0	0	#NULL!	#NULL!	#NULL!	1	0	0	0	4
0	13	0	3	24.3418	0	0	1	0	1	0	1	2	0	0	1	0	4
1	13	0	3	24.3824	0	0	0	0	0	#NULL!	#NULL!	#NULL!	1	0	0	0	1
1	7	0	1	24.3827	0	0	0	0	0	0	#NULL!	#NULL!	1	0	0	0	4
1	11	0	3	24.3827	0	0	0	0	0	#NULL!	#NULL!	#NULL!	1	0	0	0	4
0	9	0	2	24.4473	0	0	1	0	1	0	1	1	0	0	0	0	2
1	11	0	2	24.4857	0	0	0	0	0	#NULL!	#NULL!	#NULL!	1	0	0	0	4
1	13	0	3	24.4898	0	0	1	0	1	0	1	2	0	0	0	0	2
1	9	0	3	24.5693	0	0	0	0	0	#NULL!	#NULL!	#NULL!	1	0	0	0	2
0	5	0	2	24.5779	0	0	0	0	0	#NULL!	#NULL!	#NULL!	1	0	1	0	3
1	12	0	2	24.5779	0	0	0	0	0	#NULL!	#NULL!	#NULL!	1	0	1	0	4
1	5	0	1	24.5932	0	0	0	0	0	#NULL!	#NULL!	#NULL!	1	0	0	0	4
1	12	0	#NULL!	24.6311	0	0	0	0	0	0	#NULL!	#NULL!	1	0	0	0	1
1	5	0	3	24.6559	0	0	1	0	1	0	1	1	0	0	0	0	2
0	10	0	2	24.677	0	0	0	0	0	#NULL!	#NULL!	#NULL!	1	0	0	0	1
0	13	0	3	24.6875	0	0	0	0	0	#NULL!	#NULL!	#NULL!	1	0	0	0	4
0	14	1	2	24.6914	0	0	0	0	0	#NULL!	#NULL!	#NULL!	1	0	0	0	4
1	9	0	2	24.7676	0	0	0	0	0	#NULL!	#NULL!	#NULL!	1	0	0	0	1
0	12	0	2	24.7676	0	0	0	0	0	#NULL!	#NULL!	#NULL!	1	0	0	0	4
0	10	0	2	24.8016	0	0	0	0	0	#NULL!	#NULL!	#NULL!	1	0	0	0	4
0	14	1	2	24.8437	0	0	0	0	0	#NULL!	#NULL!	#NULL!	1	0	0	0	4
0	6	0	3	24.8941	0	0	1	0	1	0	1	1	0	0	0	0	4
1	11	1	3	18.6361	0	0	0	0	1	2	1	4	0	1	0	0	1
0	3	0	2	19.2277	0	0	0	0	1	2	2	4	0	1	0	0	1
1	10	0	1	19.4444	1	1	1	0	1	2	2	5	0	1	0	0	1
0	14	1	2	19.5312	#NULL!	#NULL!	#NULL!	1	1	2	#NULL!	#NULL!	1	1	0	0	4
0	12	1	2	19.5312	1	1	1	0	1	2	1	4	0	1	0	0	4
1	12	1	4	19.6232	0	0	0	0	1	2	1	4	0	1	0	0	4
0	14	1	3	19.8141	0	0	0	0	1	2	1	4	0	1	0	0	4
0	8	0	2	19.8791	1	0	0	0	1	2	1	3	0	1	0	0	1
1	13	0	2	19.947	0	0	0	0	1	2	1	4	0	1	0	0	1
0	13	1	2	20.0773	0	0	0	0	1	3	1	5	0	1	0	0	4
1	4	0	2	20.1885	1	1	0	0	1	2	1	3	0	1	0	0	1
0	10	1	1	20.3125	0	0	0	0	1	2	1	3	0	1	0	0	4
0	13	0	4	20.4382	0	0	0	0	1	2	#NULL!	#NULL!	1	1	0	0	2
1	13	1	3	20.6382	0	1	1	0	1	3	1	5	0	1	0	0	1
0	8	0	2	20.7008	1	1	1	0	1	1	3	4	0	1	0	0	1
0	16	1	3	20.7031	1	1	0	0	1	1	1	3	0	1	0	0	4
0	5	0	2	20.7812	0	1	0	0	1	2	2	4	0	1	0	0	1
0	9	0	2	20.794	1	1	0	0	1	2	1	3	0	1	0	0	1
0	1	1	2	21.2891	0	1	0	0	1	2	1	3	0	1	0	0	1
0	9	0	2	21.7503	1	1	1	0	1	1	2	3	0	1	0	0	1
1	12	1	3	21.8699	1	1	1	0	1	1	1	3	0	1	0	0	4
1	11	0	3	22.8571	0	1	0	0	1	1	1	3	0	1	0	0	2
1	11	0	3	23.1084	0	0	1	0	1	0	2	3	0	1	1	0	2
0	12	0	3	23.2377	0	0	1	0	1	0	2	3	0	1	0	0	2
0	14	0	3	23.3399	1	1	0	0	1	1	1	3	0	1	0	0	1
1	8	1	3	23.6295	0	1	0	0	1	1	2	3	0	1	0	0	1
1	12	0	2	24.2513	1	1	0	0	1	2	2	5	0	1	0	0	1
1	8	1	2	24.7721	1	1	0	0	1	2	1	3	0	1	0	0	1
1	12	1	4	24.7843	0	0	1	0	1	1	3	5	0	1	0	0	1
1	14	1	3	24.8356	1	1	0	0	1	3	1	5	0	1	0	0	4
0	14	1	4	25.0135	0	0	0	0	0	#NULL!	#NULL!	#NULL!	1	0	0	0	4
1	9	0	3	25.0135	1	0	1	0	1	0	1	1	0	0	0	0	2
1	8	0	3	25.0298	1	1	0	0	1	0	2	2	0	0	0	0	2
1	9	0	1	25.0888	0	0	0	0	0	#NULL!	#NULL!	#NULL!	1	0	0	0	1
1	6	0	1	25.1811	0	0	0	0	0	#NULL!	#NULL!	#NULL!	1	0	0	0	4
0	5	0	2	25.1867	1	1	0	0	1	1	1	2	0	0	0	0	1
0	9	1	2	25.1903	0	0	0	0	0	#NULL!	#NULL!	#NULL!	1	0	0	0	1
1	12	0	2	25.2493	0	0	0	0	0	#NULL!	#NULL!	#NULL!	1	0	0	0	1
0	12	0	3	25.2595	0	0	0	0	0	#NULL!	#NULL!	#NULL!	1	0	0	0	4
1	10	0	3	25.2595	1	1	1	0	1	0	1	1	0	0	0	0	2
0	11	0	2	25.3422	0	0	0	0	0	#NULL!	#NULL!	#NULL!	1	0	0	0	4
1	11	0	3	25.3515	0	0	1	0	1	0	1	2	0	0	0	0	2
1	11	0	3	25.3815	1	0	1	0	1	0	1	2	0	0	0	0	2
1	8	1	3	25.4571	0	0	0	0	0	0	#NULL!	#NULL!	1	0	0	0	1
1	11	0	3	25.4694	0	0	0	0	0	#NULL!	#NULL!	#NULL!	1	0	0	0	2
1	10	0	1	25.5102	0	0	0	0	0	#NULL!	#NULL!	#NULL!	1	0	0	0	1
1	1	1	1	25.6173	0	0	0	0	0	#NULL!	#NULL!	#NULL!	1	0	0	0	1
1	10	0	2	25.6173	0	0	0	0	0	#NULL!	#NULL!	#NULL!	1	0	0	0	1
1	11	0	2	25.6173	0	0	0	0	0	0	#NULL!	#NULL!	1	0	0	0	4
1	5	0	1	25.6787	0	1	0	0	1	1	1	2	0	0	0	0	1
0	13	0	3	25.721	0	0	0	0	0	#NULL!	#NULL!	#NULL!	1	0	0	0	4
1	9	0	2	25.7469	0	0	0	0	0	#NULL!	#NULL!	#NULL!	1	0	0	0	4
0	12	1	2	25.7657	0	0	0	0	0	#NULL!	#NULL!	#NULL!	1	0	0	0	4
1	10	0	3	25.8546	0	0	1	0	1	0	1	1	0	0	0	0	2
1	10	0	2	25.8806	1	0	0	0	1	1	1	2	0	0	0	0	1
1	13	0	2	25.9516	0	0	0	0	0	#NULL!	#NULL!	#NULL!	1	0	0	0	1
1	8	0	3	26.0146	0	0	0	0	0	#NULL!	#NULL!	#NULL!	1	0	0	0	4
1	10	1	3	26.023	0	0	0	0	0	#NULL!	#NULL!	#NULL!	1	0	0	0	1
0	14	1	2	26.1224	0	0	0	0	0	#NULL!	#NULL!	#NULL!	1	0	1	0	4
0	10	0	2	26.1286	0	0	0	0	0	#NULL!	#NULL!	#NULL!	1	0	0	0	4
1	9	0	2	26.1591	1	0	0	0	1	0	1	1	0	0	0	0	1
1	11	0	3	26.2649	0	0	1	0	1	0	1	2	0	0	0	0	2
0	12	0	2	26.2715	0	0	0	0	0	#NULL!	#NULL!	#NULL!	1	0	0	0	4
1	9	0	3	26.2878	0	0	0	0	0	#NULL!	#NULL!	#NULL!	1	0	0	0	2
1	11	0	2	26.2976	0	0	0	0	0	0	#NULL!	#NULL!	1	0	0	0	1
1	13	1	3	26.3158	0	0	0	0	0	#NULL!	#NULL!	#NULL!	1	0	0	0	4
1	13	1	4	26.3158	0	0	0	0	0	#NULL!	#NULL!	#NULL!	1	0	0	0	4
0	10	0	2	26.3465	0	0	0	0	0	#NULL!	#NULL!	#NULL!	1	0	0	0	4
1	13	0	3	26.3465	0	0	0	0	0	#NULL!	#NULL!	#NULL!	1	0	0	0	2
0	5	0	2	26.354	1	1	0	0	1	1	1	2	0	0	1	0	1
1	9	0	4	26.3656	0	0	1	0	1	0	1	1	0	0	0	0	2
1	10	0	3	26.4463	0	0	0	0	0	#NULL!	#NULL!	#NULL!	1	0	0	0	2
0	10	0	3	26.4463	0	0	1	0	1	0	2	2	0	0	0	0	2
0	8	0	2	26.5731	0	0	0	0	0	#NULL!	#NULL!	#NULL!	1	0	0	0	4
1	7	0	2	26.5731	0	0	0	0	0	#NULL!	#NULL!	#NULL!	1	0	0	0	1
0	12	1	2	26.5731	0	0	0	0	0	#NULL!	#NULL!	#NULL!	1	0	1	0	4
0	7	0	1	26.6097	0	0	0	0	0	#NULL!	#NULL!	#NULL!	1	0	0	0	1
0	13	0	3	26.6728	0	0	0	0	0	#NULL!	#NULL!	#NULL!	1	0	0	0	4
0	12	1	2	26.6728	0	0	0	0	0	#NULL!	#NULL!	#NULL!	1	0	0	0	4
0	12	0	3	26.7229	0	0	0	0	0	#NULL!	#NULL!	#NULL!	1	0	1	0	2
1	9	0	3	26.7949	0	0	1	0	1	0	1	1	0	0	0	0	2
1	12	0	2	26.8519	0	0	0	0	0	#NULL!	#NULL!	#NULL!	1	0	0	0	4
1	7	0	3	26.8519	0	0	0	0	0	#NULL!	#NULL!	#NULL!	1	0	0	0	2
0	12	0	2	26.8544	0	0	0	0	0	#NULL!	#NULL!	#NULL!	1	0	0	0	4
1	4	0	1	26.8698	0	0	0	0	0	#NULL!	#NULL!	#NULL!	1	0	0	0	4
0	11	0	2	26.8923	0	0	0	0	0	#NULL!	#NULL!	#NULL!	1	0	0	0	4
1	10	0	3	26.9274	0	0	0	0	0	#NULL!	#NULL!	#NULL!	1	0	0	0	2
0	9	0	1	26.9896	0	0	0	0	0	#NULL!	#NULL!	#NULL!	1	0	0	0	4
1	10	0	1	27.0169	0	0	0	0	0	#NULL!	#NULL!	#NULL!	1	0	0	0	4
1	7	0	3	27.0416	0	0	1	0	1	0	1	1	0	0	0	0	2
1	8	0	2	27.0484	0	0	0	0	0	#NULL!	#NULL!	#NULL!	1	0	0	0	1
1	8	0	3	27.0842	0	1	1	0	1	0	1	1	0	0	0	0	2
0	7	0	1	27.1416	0	0	0	0	0	#NULL!	#NULL!	#NULL!	1	0	0	0	4
1	9	0	3	27.1708	0	0	0	0	0	#NULL!	#NULL!	#NULL!	1	0	0	0	4
1	9	0	3	27.1708	0	0	0	0	0	#NULL!	#NULL!	#NULL!	1	0	0	0	2
1	8	0	3	27.1708	0	0	1	0	1	0	1	1	0	0	0	0	2
1	7	0	3	27.1731	0	0	0	0	0	#NULL!	#NULL!	#NULL!	1	0	0	0	2
0	10	0	1	27.2509	0	0	0	0	0	#NULL!	#NULL!	#NULL!	1	0	0	0	4
0	9	0	3	27.268	0	0	0	0	0	#NULL!	#NULL!	#NULL!	1	0	0	0	3
1	10	0	3	27.31	0	1	1	0	1	0	1	1	0	0	0	0	2
1	6	0	2	27.3192	0	0	0	0	0	#NULL!	#NULL!	#NULL!	1	0	1	0	1
0	13	0	2	27.3909	0	0	0	0	0	#NULL!	#NULL!	#NULL!	1	0	0	0	4
1	8	0	1	27.4145	0	0	0	0	0	#NULL!	#NULL!	#NULL!	1	0	0	0	1
1	6	0	2	27.4717	0	0	0	0	0	#NULL!	#NULL!	#NULL!	1	0	0	0	4
0	12	0	2	27.5134	0	0	0	0	0	#NULL!	#NULL!	#NULL!	1	0	0	0	4
1	1	0	1	27.7389	0	0	0	0	0	#NULL!	#NULL!	#NULL!	1	0	0	0	4
1	8	0	4	27.7489	0	0	1	0	1	0	1	1	0	0	0	0	2
1	14	0	2	27.7551	0	0	0	0	0	#NULL!	#NULL!	#NULL!	1	0	0	0	4
1	5	0	3	27.7744	0	0	1	0	1	0	1	1	0	0	0	0	2
1	5	0	2	27.7778	0	0	0	0	0	#NULL!	#NULL!	#NULL!	1	0	0	0	4
0	13	1	3	27.8125	0	0	0	0	0	#NULL!	#NULL!	#NULL!	1	0	0	0	4
1	5	1	3	27.8246	1	1	0	0	1	0	0	0	0	0	0	0	1
0	13	0	2	27.8488	0	0	0	0	0	#NULL!	#NULL!	#NULL!	1	0	0	0	4
0	9	0	2	28.0102	0	0	0	0	0	#NULL!	#NULL!	#NULL!	1	0	0	0	4
1	9	0	3	28.0102	0	0	1	0	1	0	2	2	0	0	0	0	2
0	12	0	2	28.0277	0	0	0	0	0	#NULL!	#NULL!	#NULL!	1	0	0	0	1
0	5	0	2	28.0428	0	0	0	0	0	#NULL!	#NULL!	#NULL!	1	0	0	0	4
0	12	0	2	28.125	0	0	0	0	0	#NULL!	#NULL!	#NULL!	1	0	0	0	4
0	8	0	3	28.125	0	0	0	0	0	#NULL!	#NULL!	#NULL!	1	0	0	0	4
0	12	0	2	28.1641	0	0	0	0	0	#NULL!	#NULL!	#NULL!	1	0	0	0	4
0	11	0	3	28.1969	0	0	0	0	0	#NULL!	#NULL!	#NULL!	1	0	0	0	4
0	12	0	3	28.2284	0	0	0	0	0	#NULL!	#NULL!	#NULL!	1	0	0	0	4
0	13	0	3	28.2284	0	1	0	0	1	1	0	2	0	0	0	0	4
1	5	0	3	28.2548	0	0	1	0	1	0	1	1	0	0	0	0	2
0	12	1	2	28.306	0	0	0	0	0	#NULL!	#NULL!	#NULL!	1	0	0	0	1
1	10	0	3	28.3419	0	0	0	0	0	#NULL!	#NULL!	#NULL!	1	0	0	0	4
0	10	0	2	28.3447	0	0	0	0	0	#NULL!	#NULL!	#NULL!	1	0	0	0	4
0	2	0	1	28.3447	0	0	0	0	0	#NULL!	#NULL!	#NULL!	1	0	1	0	1
1	10	0	4	28.3848	0	0	0	0	0	#NULL!	#NULL!	#NULL!	1	0	0	0	4
1	9	0	3	28.4055	0	0	1	0	1	0	1	1	0	0	0	0	2
1	15	1	3	28.4341	0	0	0	0	0	0	#NULL!	#NULL!	1	0	0	0	4
1	6	0	2	28.6689	0	0	0	0	0	#NULL!	#NULL!	#NULL!	1	0	0	0	4
0	10	0	3	28.6851	0	0	1	0	1	0	2	2	0	0	0	0	2
1	9	0	3	28.6927	0	0	1	0	1	0	2	2	0	0	0	0	2
1	4	1	1	28.7037	0	0	0	0	0	#NULL!	#NULL!	#NULL!	1	0	0	0	1
0	13	1	2	28.7197	0	0	0	0	0	#NULL!	#NULL!	#NULL!	1	0	0	0	4
1	4	1	2	28.8089	0	0	0	0	0	#NULL!	#NULL!	#NULL!	1	0	0	0	4
1	11	0	3	28.9461	0	0	0	0	0	#NULL!	#NULL!	#NULL!	1	0	0	0	1
1	7	0	2	28.982	0	0	0	0	0	#NULL!	#NULL!	#NULL!	1	0	0	0	4
1	8	0	3	28.9979	0	0	0	0	0	#NULL!	#NULL!	#NULL!	1	0	0	0	2
0	10	0	3	29.0006	0	0	0	0	0	#NULL!	#NULL!	#NULL!	1	0	0	0	4
0	11	0	2	29.0174	0	0	0	0	0	#NULL!	#NULL!	#NULL!	1	0	0	0	4
1	7	0	1	29.0253	0	0	0	0	0	#NULL!	#NULL!	#NULL!	1	0	1	0	1
0	13	0	2	29.0318	0	0	0	0	0	#NULL!	#NULL!	#NULL!	1	0	0	0	4
1	9	0	2	29.0548	0	0	0	0	0	#NULL!	#NULL!	#NULL!	1	0	0	0	4
0	13	1	3	29.0606	0	0	0	0	0	#NULL!	#NULL!	#NULL!	1	0	0	0	4
0	9	0	2	29.0688	0	0	0	0	0	#NULL!	#NULL!	#NULL!	1	0	0	0	4
1	8	0	3	29.2969	0	0	1	0	1	0	2	2	0	0	0	0	2
1	10	0	3	29.321	0	0	0	0	0	#NULL!	#NULL!	#NULL!	1	0	0	0	4
1	11	0	3	29.321	0	0	0	0	0	#NULL!	#NULL!	#NULL!	1	0	0	0	4
1	10	0	3	29.321	1	0	1	0	1	0	2	2	0	0	1	0	2
1	12	0	3	29.3658	0	0	0	0	0	#NULL!	#NULL!	#NULL!	1	0	0	0	2
0	13	0	2	29.3848	0	0	0	0	0	#NULL!	#NULL!	#NULL!	1	0	0	0	4
0	10	1	1	29.4023	0	0	0	0	0	#NULL!	#NULL!	#NULL!	1	0	0	0	1
1	12	0	3	29.4029	0	0	0	0	0	#NULL!	#NULL!	#NULL!	1	0	0	0	4
0	13	1	2	29.4118	0	0	0	0	0	0	#NULL!	#NULL!	1	0	0	0	4
0	13	0	2	29.6665	0	0	0	0	0	#NULL!	#NULL!	#NULL!	1	0	0	0	4
1	8	0	3	29.668	1	0	0	0	1	0	1	1	0	0	0	0	2
0	7	0	1	29.6875	0	0	0	0	0	#NULL!	#NULL!	#NULL!	1	0	0	0	1
0	9	0	2	29.6875	0	0	0	0	0	#NULL!	#NULL!	#NULL!	1	0	0	0	4
0	7	0	1	29.7339	0	0	0	0	0	#NULL!	#NULL!	#NULL!	1	0	0	0	1
1	11	0	3	29.7442	0	0	0	0	0	0	#NULL!	#NULL!	1	0	0	0	4
0	9	0	3	29.7458	0	0	1	0	1	0	1	1	0	0	0	0	2
0	9	0	2	29.7578	0	0	0	0	0	#NULL!	#NULL!	#NULL!	1	0	0	0	4
1	2	1	1	29.8606	0	0	0	0	0	#NULL!	#NULL!	#NULL!	1	0	0	0	1
0	8	1	3	25.1486	1	1	0	0	1	2	1	3	0	1	0	0	1
0	11	0	2	25.2595	1	1	0	0	1	2	1	4	0	1	0	0	1
0	12	0	2	25.3155	0	1	0	0	1	1	1	3	0	1	0	0	2
1	12	0	#NULL!	25.6513	1	1	0	0	1	2	0	3	0	1	0	0	1
1	9	1	2	25.763	0	0	1	0	1	1	2	3	0	1	0	0	1
0	10	0	3	25.7657	1	0	0	0	1	3	0	4	0	1	0	0	2
1	9	0	3	26.5044	0	1	0	0	1	2	2	4	0	1	0	0	1
1	14	1	3	26.5927	0	1	1	0	1	0	2	3	0	1	0	0	4
0	1	0	2	27.3588	0	1	0	0	1	2	1	3	0	1	1	0	1
1	12	1	3	27.4691	0	0	1	0	1	0	2	3	0	1	0	0	2
1	11	0	3	27.6817	0	0	1	0	1	0	2	3	0	1	0	0	2
1	5	0	3	28.0864	1	1	1	0	1	2	2	4	0	1	0	0	2
1	12	0	2	28.089	1	1	0	0	1	3	1	5	0	1	0	0	1
1	11	0	2	28.3333	1	1	0	0	1	3	2	6	0	1	0	0	1
0	11	0	2	28.5289	1	1	0	0	1	1	1	3	0	1	0	0	1
0	10	0	3	29.2101	0	0	1	0	1	0	2	3	0	1	0	0	2
1	8	1	2	29.2726	0	1	1	0	1	3	1	4	0	1	0	0	1
1	13	0	2	30.0568	0	0	0	0	0	#NULL!	#NULL!	#NULL!	1	0	1	0	4
0	9	0	2	30.0914	0	0	0	0	0	#NULL!	#NULL!	#NULL!	1	0	0	0	4
1	8	0	3	30.1592	0	0	1	0	1	0	1	1	0	0	0	0	2
1	8	0	2	30.1896	0	0	0	0	0	#NULL!	#NULL!	#NULL!	1	0	0	0	1
0	13	0	2	30.2978	0	0	0	0	0	#NULL!	#NULL!	#NULL!	1	0	0	0	4
0	10	0	2	30.3233	0	0	0	0	0	#NULL!	#NULL!	#NULL!	1	0	0	0	4
0	9	0	2	30.3593	0	0	0	0	0	#NULL!	#NULL!	#NULL!	1	0	0	0	4
0	7	0	2	30.4498	0	1	0	0	1	2	0	2	0	0	0	0	1
0	13	0	2	30.4832	0	0	0	0	0	0	#NULL!	#NULL!	1	0	0	0	4
0	8	0	1	30.4867	0	0	0	0	0	#NULL!	#NULL!	#NULL!	1	0	0	0	4
0	11	0	2	30.4878	0	0	0	0	0	#NULL!	#NULL!	#NULL!	1	0	0	0	4
1	5	0	2	30.7942	0	0	0	0	0	0	#NULL!	#NULL!	1	0	0	0	1
0	5	1	2	30.8112	0	0	0	0	0	#NULL!	#NULL!	#NULL!	1	0	0	0	1
1	10	0	1	30.9156	0	0	0	0	0	#NULL!	#NULL!	#NULL!	1	0	1	0	1
1	9	0	3	30.9304	0	1	1	0	1	0	1	1	0	0	0	0	2
0	8	0	1	30.9917	0	0	0	0	0	#NULL!	#NULL!	#NULL!	1	0	0	0	4
0	8	0	2	31.0735	0	0	0	0	0	#NULL!	#NULL!	#NULL!	1	0	0	0	4
0	10	0	3	31.2394	0	0	0	0	0	#NULL!	#NULL!	#NULL!	1	0	0	0	4
0	13	0	2	31.245	0	0	0	0	0	#NULL!	#NULL!	#NULL!	1	0	0	0	4
0	7	0	2	31.245	0	0	0	0	0	#NULL!	#NULL!	#NULL!	1	0	0	0	4
1	10	0	2	31.2461	0	0	0	0	0	#NULL!	#NULL!	#NULL!	1	0	0	0	4
0	13	0	2	31.2488	0	0	0	0	0	#NULL!	#NULL!	#NULL!	1	0	0	0	4
0	13	0	2	31.2488	0	0	0	0	0	#NULL!	#NULL!	#NULL!	1	0	0	0	4
1	7	0	2	31.2809	0	0	0	0	0	#NULL!	#NULL!	#NULL!	1	0	0	0	4
0	13	0	2	31.7406	0	0	0	0	0	#NULL!	#NULL!	#NULL!	1	0	0	0	4
1	8	0	2	31.8481	0	0	0	0	0	#NULL!	#NULL!	#NULL!	1	0	0	0	1
0	11	0	3	32.0513	0	0	0	0	0	0	#NULL!	#NULL!	1	0	1	0	1
1	11	0	3	32.1799	0	0	0	0	0	#NULL!	#NULL!	#NULL!	1	0	0	0	1
1	8	0	#NULL!	32.1799	0	0	1	0	1	0	1	1	0	0	0	0	2
0	12	0	2	32.1799	0	0	0	0	0	#NULL!	#NULL!	#NULL!	1	0	1	0	1
0	11	0	2	32.2708	0	0	0	0	0	#NULL!	#NULL!	#NULL!	1	0	0	0	3
0	12	0	3	32.2979	0	0	1	0	1	0	1	2	0	0	0	0	2
1	8	0	#NULL!	32.5085	0	0	1	0	1	0	1	1	0	0	0	0	2
0	11	0	2	32.7919	0	0	0	0	0	#NULL!	#NULL!	#NULL!	1	0	0	0	4
1	12	0	2	32.8241	1	1	0	0	1	1	0	2	0	0	0	0	4
1	9	0	3	32.872	0	0	1	0	1	0	1	1	0	0	0	0	2
1	9	0	2	33.0295	0	0	0	0	0	#NULL!	#NULL!	#NULL!	1	0	0	0	4
1	12	0	2	33.126	0	0	0	0	0	#NULL!	#NULL!	#NULL!	1	0	0	0	4
0	10	0	2	33.305	0	0	0	0	0	#NULL!	#NULL!	#NULL!	1	0	0	0	1
1	11	0	3	33.3061	0	0	0	0	0	#NULL!	#NULL!	#NULL!	1	0	0	0	2
1	9	1	3	33.5765	1	1	0	0	1	1	1	2	0	0	1	0	1
0	13	0	2	33.5937	0	0	0	0	0	#NULL!	#NULL!	#NULL!	1	0	0	0	4
0	12	0	2	33.7325	0	0	0	0	0	#NULL!	#NULL!	#NULL!	1	0	0	0	1
0	9	1	2	33.7988	0	0	0	0	0	#NULL!	#NULL!	#NULL!	1	0	1	0	4
0	11	1	2	33.9844	0	0	0	0	0	#NULL!	#NULL!	#NULL!	1	0	0	0	4
1	8	0	3	34.0203	0	0	0	0	0	#NULL!	#NULL!	#NULL!	1	0	0	0	4
1	8	0	2	34.1537	0	0	0	0	0	0	#NULL!	#NULL!	1	0	1	0	4
1	10	0	3	34.3161	0	0	1	0	1	0	1	1	0	0	0	0	2
0	10	0	3	34.4842	0	0	1	0	1	0	1	1	0	0	0	0	2
1	9	0	3	34.6021	0	0	1	0	1	0	2	2	0	0	0	0	2
1	7	0	2	34.6861	0	0	0	0	0	#NULL!	#NULL!	#NULL!	1	0	0	0	1
1	6	1	2	34.7178	0	0	0	0	0	0	#NULL!	#NULL!	1	0	0	0	1
0	9	0	2	35.0128	0	0	0	0	0	#NULL!	#NULL!	#NULL!	1	0	0	0	4
0	6	0	2	35.629	0	0	0	0	0	#NULL!	#NULL!	#NULL!	1	0	0	0	4
1	10	0	3	35.7132	0	0	1	0	1	0	1	2	0	0	0	0	2
0	5	1	2	36.1392	1	1	0	0	1	2	0	2	0	0	0	0	1
1	5	0	2	36.5713	0	0	0	0	0	#NULL!	#NULL!	#NULL!	1	0	0	0	4
1	5	0	2	36.6115	0	0	0	0	0	#NULL!	#NULL!	#NULL!	1	0	0	0	1
0	1	0	2	37.551	0	0	0	0	0	#NULL!	#NULL!	#NULL!	1	0	0	0	4
1	9	0	3	37.7712	0	0	1	0	1	0	1	1	0	0	0	0	2
0	9	0	2	39.2471	0	0	0	0	0	#NULL!	#NULL!	#NULL!	1	0	0	0	4
0	14	1	2	39.6365	0	0	0	0	0	0	#NULL!	#NULL!	1	0	0	0	4
1	8	0	3	40.1781	0	1	0	0	1	0	1	1	0	0	0	0	1
1	8	0	3	44.5506	0	0	0	0	0	#NULL!	#NULL!	#NULL!	1	0	0	0	4
0	12	0	3	46.4844	0	0	0	0	0	#NULL!	#NULL!	#NULL!	1	0	0	0	4
1	2	1	2	51.2465	0	0	0	0	0	#NULL!	#NULL!	#NULL!	1	0	0	0	1
0	11	0	3	33.0717	0	1	0	0	1	1	1	3	0	1	0	0	4
1	7	1	3	37.452	0	0	1	0	1	2	3	5	0	1	0	0	1
1	14	0	2	24.8356	0	0	0	0	0	#NULL!	#NULL!	#NULL!	1	0	1	0	1
1	10	0	2	22.9854	0	0	0	0	0	#NULL!	#NULL!	#NULL!	1	0	1	0	1
1	12	0	3	23.3887	0	0	0	0	0	#NULL!	#NULL!	#NULL!	1	0	1	0	1
1	3	0	2	22.9926	1	1	1	0	1	2	2	4	0	1	1	0	1
1	13	1	4	25.58	0	0	0	0	0	#NULL!	#NULL!	#NULL!	1	0	1	0	1
0	5	0	1	28.6851	0	0	0	0	0	#NULL!	#NULL!	#NULL!	1	0	1	0	3
1	8	0	3	#NULL!	1	1	1	1	1	0	1	1	0	0	0	#NULL!	2
1	12	0	3	14.2045	0	1	0	0	1	3	2	6	0	1	0	#NULL!	1
0	8	0	3	14.5653	1	1	0	0	1	3	1	4	0	1	0	#NULL!	1
0	11	1	2	14.7011	0	0	0	0	1	3	1	5	0	1	0	#NULL!	4
0	14	1	2	15.625	1	1	0	0	1	3	1	5	0	1	0	#NULL!	4
1	10	1	4	15.7369	1	1	1	0	1	3	3	7	0	1	0	#NULL!	4
0	3	0	2	15.978	1	1	0	0	1	3	1	4	0	1	0	#NULL!	1
1	1	0	3	16.664	1	1	0	0	1	3	2	5	0	1	0	#NULL!	1
0	11	1	2	17.0286	0	0	#NULL!	1	1	3	#NULL!	#NULL!	1	1	0	#NULL!	4
0	1	1	2	17.1029	0	1	0	0	1	3	1	4	0	1	0	#NULL!	1
0	13	1	2	17.2111	0	0	0	0	1	3	#NULL!	#NULL!	1	1	0	#NULL!	4
1	15	1	3	17.284	1	1	0	0	1	3	1	5	0	1	0	#NULL!	4
0	8	1	3	17.3604	0	0	0	0	1	3	2	5	0	1	0	#NULL!	4
1	6	0	3	17.4329	1	1	0	0	1	3	2	5	0	1	0	#NULL!	2
0	13	0	3	17.4979	0	0	0	0	1	3	0	4	0	1	0	#NULL!	4
0	14	1	2	17.782	0	0	0	0	1	3	0	4	0	1	0	#NULL!	4
0	12	0	3	18.132	0	0	1	0	1	3	1	5	0	1	0	#NULL!	2
0	14	1	3	18.132	1	1	0	0	1	3	2	6	0	1	0	#NULL!	4
0	2	0	1	18.3594	0	1	0	0	1	3	1	4	0	1	0	#NULL!	1
0	9	0	1	18.3655	0	0	0	0	1	3	0	3	0	1	0	#NULL!	4
0	9	0	2	24.9135	0	0	0	0	0	#NULL!	#NULL!	#NULL!	1	0	0	#NULL!	4
1	11	0	2	24.9337	0	0	0	0	0	0	#NULL!	#NULL!	1	0	0	#NULL!	4
0	10	0	3	24.9649	0	0	0	0	0	#NULL!	#NULL!	#NULL!	1	0	0	#NULL!	4
1	10	0	1	24.968	0	0	0	0	0	#NULL!	#NULL!	#NULL!	1	0	0	#NULL!	4
0	9	0	1	24.974	0	0	0	0	0	#NULL!	#NULL!	#NULL!	1	0	0	#NULL!	4
1	10	0	1	18.7783	0	0	0	0	1	2	0	2	0	0	0	#NULL!	4
0	8	0	2	18.902	0	0	0	0	1	2	0	2	0	0	0	#NULL!	4
0	5	0	1	19.0311	0	0	0	0	1	2	0	2	0	0	0	#NULL!	4
0	10	0	2	19.6511	1	1	0	0	1	2	0	2	0	0	0	#NULL!	3
0	8	0	3	19.7055	0	0	0	0	1	2	0	2	0	0	0	#NULL!	3
0	5	0	1	19.736	0	0	0	0	1	2	0	2	0	0	0	#NULL!	4
0	3	1	3	20.2865	0	0	0	0	1	2	0	2	0	0	0	#NULL!	3
0	5	1	#NULL!	20.4467	0	0	0	0	1	2	0	2	0	0	0	#NULL!	1
0	6	0	2	20.5191	0	0	0	0	0	#NULL!	#NULL!	#NULL!	1	0	0	#NULL!	4
0	9	0	2	20.5693	0	0	0	0	0	2	#NULL!	#NULL!	1	0	0	#NULL!	3
1	9	0	3	20.6575	0	0	0	0	0	#NULL!	#NULL!	#NULL!	1	0	0	#NULL!	4
0	11	1	3	20.6575	0	0	0	0	0	2	#NULL!	#NULL!	1	0	0	#NULL!	4
1	9	0	2	20.6612	0	0	0	0	0	#NULL!	#NULL!	#NULL!	1	0	0	#NULL!	4
0	13	1	2	20.7031	0	0	0	0	0	2	#NULL!	#NULL!	1	0	0	#NULL!	4
0	15	1	3	20.7612	0	0	0	0	0	#NULL!	#NULL!	#NULL!	1	0	0	#NULL!	4
0	6	0	1	20.7667	0	0	0	0	0	#NULL!	#NULL!	#NULL!	1	0	0	#NULL!	3
0	9	0	1	20.7967	0	0	0	0	0	#NULL!	#NULL!	#NULL!	1	0	0	#NULL!	4
0	14	1	3	20.8117	0	0	0	0	0	#NULL!	#NULL!	#NULL!	1	0	0	#NULL!	4
0	11	0	2	20.8325	0	0	0	0	0	2	#NULL!	#NULL!	1	0	1	#NULL!	3
1	8	1	1	20.898	0	0	0	0	0	#NULL!	#NULL!	#NULL!	1	0	0	#NULL!	1
1	14	1	2	20.9024	0	0	0	0	0	#NULL!	#NULL!	#NULL!	1	0	0	#NULL!	4
0	12	0	2	20.9042	0	0	0	0	0	#NULL!	#NULL!	#NULL!	1	0	0	#NULL!	4
1	16	1	3	20.9572	0	0	0	0	0	2	#NULL!	#NULL!	1	0	0	#NULL!	4
0	10	0	2	20.9572	0	0	0	0	0	#NULL!	#NULL!	#NULL!	1	0	0	#NULL!	4
0	13	1	3	21.0321	0	0	0	0	0	#NULL!	#NULL!	#NULL!	1	0	0	#NULL!	4
1	14	1	1	21.0421	0	1	0	0	1	0	1	2	0	0	0	#NULL!	4
0	12	0	2	21.048	0	0	0	0	0	#NULL!	#NULL!	#NULL!	1	0	0	#NULL!	4
0	13	0	3	21.0828	0	0	0	0	0	#NULL!	#NULL!	#NULL!	1	0	0	#NULL!	3
0	8	0	2	21.2183	0	0	0	0	0	#NULL!	#NULL!	#NULL!	1	0	0	#NULL!	4
0	8	0	2	21.2183	0	0	0	0	0	#NULL!	#NULL!	#NULL!	1	0	0	#NULL!	4
0	11	0	2	21.2585	0	0	0	0	0	2	#NULL!	#NULL!	1	0	0	#NULL!	3
0	12	1	2	21.2953	0	0	0	0	0	#NULL!	#NULL!	#NULL!	1	0	0	#NULL!	1
0	12	0	2	21.3039	0	0	0	0	0	0	#NULL!	#NULL!	1	0	0	#NULL!	1
0	10	0	2	21.3039	0	0	0	0	0	#NULL!	#NULL!	#NULL!	1	0	0	#NULL!	1
0	2	1	1	21.3578	0	0	0	0	0	#NULL!	#NULL!	#NULL!	1	0	0	#NULL!	1
0	10	0	4	21.3593	1	0	0	0	1	1	0	2	0	0	0	#NULL!	2
0	12	0	2	21.3675	0	0	0	0	0	#NULL!	#NULL!	#NULL!	1	0	0	#NULL!	1
0	6	0	2	21.3839	0	0	0	0	0	#NULL!	#NULL!	#NULL!	1	0	0	#NULL!	4
0	10	0	1	21.4536	0	0	0	0	0	#NULL!	#NULL!	#NULL!	1	0	0	#NULL!	4
0	6	0	2	21.4619	0	0	0	0	0	0	#NULL!	#NULL!	1	0	0	#NULL!	3
0	5	0	1	21.5045	0	0	0	0	0	#NULL!	#NULL!	#NULL!	1	0	0	#NULL!	3
0	14	1	2	21.5349	0	0	0	0	0	#NULL!	#NULL!	#NULL!	1	0	0	#NULL!	4
0	10	0	2	21.5451	0	0	0	0	0	#NULL!	#NULL!	#NULL!	1	0	0	#NULL!	1
0	10	0	2	21.6128	0	0	0	0	0	#NULL!	#NULL!	#NULL!	1	0	0	#NULL!	1
1	13	1	2	21.6263	0	0	0	0	0	#NULL!	#NULL!	#NULL!	1	0	0	#NULL!	4
0	14	1	3	21.6413	0	0	0	0	0	#NULL!	#NULL!	#NULL!	1	0	0	#NULL!	4
1	12	1	3	21.6815	0	0	0	0	0	#NULL!	#NULL!	#NULL!	1	0	0	#NULL!	4
0	8	0	2	21.7181	1	1	0	0	1	1	1	2	0	0	0	#NULL!	1
1	9	0	2	21.7365	0	0	0	0	0	#NULL!	#NULL!	#NULL!	1	0	0	#NULL!	2
0	10	0	1	21.7993	0	0	0	0	0	#NULL!	#NULL!	#NULL!	1	0	0	#NULL!	4
0	13	1	2	21.7994	0	0	0	0	0	#NULL!	#NULL!	#NULL!	1	0	0	#NULL!	4
0	9	0	2	21.83	0	0	0	0	0	2	#NULL!	#NULL!	1	0	0	#NULL!	3
0	12	0	2	21.83	0	0	0	0	0	#NULL!	#NULL!	#NULL!	1	0	0	#NULL!	4
0	13	1	3	21.875	0	0	0	0	0	#NULL!	#NULL!	#NULL!	1	0	0	#NULL!	4
0	13	1	2	21.9261	0	0	0	0	0	#NULL!	#NULL!	#NULL!	1	0	0	#NULL!	4
0	12	1	2	21.9671	0	0	0	0	0	#NULL!	#NULL!	#NULL!	1	0	0	#NULL!	4
0	8	1	1	21.9671	0	0	0	0	0	#NULL!	#NULL!	#NULL!	1	0	0	#NULL!	1
1	6	0	3	21.9671	0	0	0	0	0	0	#NULL!	#NULL!	1	0	0	#NULL!	2
0	11	0	2	21.9671	0	0	0	0	0	#NULL!	#NULL!	#NULL!	1	0	0	#NULL!	1
0	10	0	2	21.9713	0	0	0	0	0	#NULL!	#NULL!	#NULL!	1	0	0	#NULL!	4
0	12	0	2	21.9899	0	0	0	0	0	#NULL!	#NULL!	#NULL!	1	0	0	#NULL!	4
0	10	0	2	22.1003	0	0	0	0	0	#NULL!	#NULL!	#NULL!	1	0	0	#NULL!	1
0	11	0	2	22.1003	0	0	0	0	0	#NULL!	#NULL!	#NULL!	1	0	0	#NULL!	4
1	13	0	3	22.1297	0	0	0	0	0	#NULL!	#NULL!	#NULL!	1	0	0	#NULL!	4
0	8	0	2	22.1367	0	0	0	0	0	#NULL!	#NULL!	#NULL!	1	0	0	#NULL!	4
1	9	0	3	22.1453	0	0	0	0	0	#NULL!	#NULL!	#NULL!	1	0	0	#NULL!	2
0	11	0	1	22.1453	0	0	0	0	0	#NULL!	#NULL!	#NULL!	1	0	0	#NULL!	4
0	9	0	2	22.1893	0	0	0	0	0	#NULL!	#NULL!	#NULL!	1	0	0	#NULL!	3
0	4	0	2	22.2041	0	0	0	0	0	#NULL!	#NULL!	#NULL!	1	0	0	#NULL!	3
1	9	0	2	22.2041	0	0	0	0	0	#NULL!	#NULL!	#NULL!	1	0	0	#NULL!	4
0	13	0	3	22.3214	0	0	0	0	0	0	#NULL!	#NULL!	1	0	0	#NULL!	4
1	11	0	2	22.3403	1	1	1	0	1	0	1	2	0	0	0	#NULL!	1
1	8	0	2	22.3435	0	0	0	0	0	#NULL!	#NULL!	#NULL!	1	0	0	#NULL!	1
1	7	0	1	22.3958	0	0	0	0	0	#NULL!	#NULL!	#NULL!	1	0	0	#NULL!	4
0	8	0	1	22.4323	0	0	0	0	0	#NULL!	#NULL!	#NULL!	1	0	0	#NULL!	4
0	5	0	1	22.46	0	0	0	0	0	#NULL!	#NULL!	#NULL!	1	0	0	#NULL!	4
0	12	0	2	22.4813	0	0	0	0	0	#NULL!	#NULL!	#NULL!	1	0	0	#NULL!	4
0	7	0	2	22.4913	0	0	0	0	0	#NULL!	#NULL!	#NULL!	1	0	0	#NULL!	4
0	13	0	3	22.4913	0	0	0	0	0	#NULL!	#NULL!	#NULL!	1	0	0	#NULL!	4
0	10	0	2	22.4996	0	0	0	0	0	#NULL!	#NULL!	#NULL!	1	0	0	#NULL!	1
1	9	0	3	22.5031	0	1	1	0	1	0	1	1	0	0	0	#NULL!	2
1	10	0	2	22.571	0	0	0	0	0	#NULL!	#NULL!	#NULL!	1	0	0	#NULL!	4
0	10	0	2	22.5827	0	0	0	0	0	#NULL!	#NULL!	#NULL!	1	0	0	#NULL!	4
1	9	0	3	22.5848	1	0	1	0	1	1	1	2	0	0	0	#NULL!	2
1	12	0	2	22.5878	0	0	0	0	0	#NULL!	#NULL!	#NULL!	1	0	0	#NULL!	4
1	12	0	3	22.5981	0	0	1	0	1	0	1	2	0	0	0	#NULL!	2
0	13	0	2	22.6003	0	0	0	0	0	#NULL!	#NULL!	#NULL!	1	0	0	#NULL!	3
0	7	0	1	22.7583	0	0	0	0	0	#NULL!	#NULL!	#NULL!	1	0	0	#NULL!	4
0	10	1	2	22.7583	0	0	0	0	0	#NULL!	#NULL!	#NULL!	1	0	0	#NULL!	4
0	13	1	2	22.7583	0	0	0	0	0	#NULL!	#NULL!	#NULL!	1	0	0	#NULL!	4
0	9	0	1	22.7732	0	0	0	0	0	#NULL!	#NULL!	#NULL!	1	0	0	#NULL!	4
0	14	1	2	22.7732	0	0	0	0	0	#NULL!	#NULL!	#NULL!	1	0	0	#NULL!	4
0	10	1	3	22.7903	0	0	0	0	0	#NULL!	#NULL!	#NULL!	1	0	0	#NULL!	4
1	15	1	2	22.8374	0	0	0	0	0	#NULL!	#NULL!	#NULL!	1	0	0	#NULL!	4
1	11	0	3	22.8395	0	0	0	0	0	#NULL!	#NULL!	#NULL!	1	0	0	#NULL!	2
1	14	1	4	22.8395	0	0	0	0	0	#NULL!	#NULL!	#NULL!	1	0	0	#NULL!	4
1	11	0	2	22.8571	0	0	0	0	0	#NULL!	#NULL!	#NULL!	1	0	0	#NULL!	1
0	10	0	2	22.9481	0	0	0	0	0	#NULL!	#NULL!	#NULL!	1	0	0	#NULL!	4
0	12	1	4	22.9481	0	0	0	0	0	#NULL!	#NULL!	#NULL!	1	0	0	#NULL!	4
1	11	0	3	22.9926	0	0	1	0	1	0	1	2	0	0	0	#NULL!	2
0	9	0	2	23.0112	0	0	0	0	0	#NULL!	#NULL!	#NULL!	1	0	0	#NULL!	4
0	15	1	3	23.03	0	0	0	0	0	#NULL!	#NULL!	#NULL!	1	0	0	#NULL!	4
0	9	0	2	23.0518	1	0	0	0	1	0	2	2	0	0	0	#NULL!	1
0	9	0	3	23.1405	0	0	0	0	0	#NULL!	#NULL!	#NULL!	1	0	0	#NULL!	2
1	13	0	3	23.1481	0	1	1	0	1	0	1	2	0	0	0	#NULL!	2
0	8	0	2	23.1911	0	0	0	0	0	#NULL!	#NULL!	#NULL!	1	0	0	#NULL!	4
0	11	0	3	23.2254	0	0	0	0	0	#NULL!	#NULL!	#NULL!	1	0	0	#NULL!	4
0	9	0	3	23.2335	0	0	1	0	1	0	2	2	0	0	0	#NULL!	2
1	8	0	1	23.246	0	0	0	0	0	0	#NULL!	#NULL!	1	0	0	#NULL!	4
0	12	1	3	23.255	0	0	0	0	0	#NULL!	#NULL!	#NULL!	1	0	0	#NULL!	4
1	7	0	3	23.3011	0	0	0	0	0	#NULL!	#NULL!	#NULL!	1	0	0	#NULL!	2
1	2	0	1	23.3234	0	0	0	0	0	#NULL!	#NULL!	#NULL!	1	0	0	#NULL!	1
0	11	0	1	23.3377	0	0	0	0	0	#NULL!	#NULL!	#NULL!	1	0	0	#NULL!	4
0	11	0	2	23.3887	0	0	0	0	0	#NULL!	#NULL!	#NULL!	1	0	0	#NULL!	4
0	9	0	1	23.3887	0	0	0	0	0	#NULL!	#NULL!	#NULL!	1	0	0	#NULL!	4
0	1	0	1	23.4075	0	0	0	0	0	#NULL!	#NULL!	#NULL!	1	0	0	#NULL!	1
0	11	0	2	23.4236	0	0	0	0	0	#NULL!	#NULL!	#NULL!	1	0	0	#NULL!	4
1	10	0	3	23.4493	0	0	0	0	0	#NULL!	#NULL!	#NULL!	1	0	0	#NULL!	2
0	12	0	2	23.4952	0	0	0	0	0	#NULL!	#NULL!	#NULL!	1	0	0	#NULL!	4
1	10	0	3	23.5036	1	0	1	0	1	0	2	2	0	0	0	#NULL!	2
0	6	0	1	23.5102	0	0	0	0	0	#NULL!	#NULL!	#NULL!	1	0	0	#NULL!	3
1	12	0	2	23.5134	0	0	0	0	0	#NULL!	#NULL!	#NULL!	1	0	0	#NULL!	1
0	13	1	3	23.5294	1	1	1	0	1	0	1	2	0	0	0	#NULL!	2
0	10	0	2	23.5304	0	0	0	0	0	#NULL!	#NULL!	#NULL!	1	0	0	#NULL!	4
1	13	0	3	23.6295	0	0	0	0	0	#NULL!	#NULL!	#NULL!	1	0	0	#NULL!	4
0	7	0	2	23.634	0	0	0	0	0	#NULL!	#NULL!	#NULL!	1	0	0	#NULL!	3
0	12	0	2	23.6713	0	0	0	0	0	#NULL!	#NULL!	#NULL!	1	0	0	#NULL!	4
1	9	1	1	23.6713	0	0	0	0	0	#NULL!	#NULL!	#NULL!	1	0	0	#NULL!	4
1	9	0	3	23.6713	0	0	1	0	1	0	1	1	0	0	0	#NULL!	2
0	8	0	2	23.7196	0	0	0	0	0	#NULL!	#NULL!	#NULL!	1	0	1	#NULL!	3
0	11	0	2	23.7332	0	0	0	0	0	#NULL!	#NULL!	#NULL!	1	0	0	#NULL!	1
0	8	0	2	23.7332	0	0	0	0	0	#NULL!	#NULL!	#NULL!	1	0	0	#NULL!	4
0	7	0	1	23.7387	0	0	0	0	0	#NULL!	#NULL!	#NULL!	1	0	0	#NULL!	4
0	8	0	3	23.7387	0	0	1	0	1	0	2	2	0	0	0	#NULL!	2
0	12	0	2	23.7388	0	0	0	0	0	#NULL!	#NULL!	#NULL!	1	0	0	#NULL!	1
1	11	0	2	23.7654	0	0	0	0	0	#NULL!	#NULL!	#NULL!	1	0	0	#NULL!	4
0	13	0	3	23.7709	0	0	0	0	0	#NULL!	#NULL!	#NULL!	1	0	0	#NULL!	4
0	13	1	3	23.8054	0	0	0	0	0	#NULL!	#NULL!	#NULL!	1	0	0	#NULL!	4
0	4	0	1	23.8087	0	0	0	0	0	#NULL!	#NULL!	#NULL!	1	0	0	#NULL!	3
1	11	0	3	23.8367	0	0	0	0	0	#NULL!	#NULL!	#NULL!	1	0	0	#NULL!	2
1	10	0	2	23.8367	0	0	0	0	0	#NULL!	#NULL!	#NULL!	1	0	0	#NULL!	4
0	7	0	1	23.8367	0	0	0	0	0	#NULL!	#NULL!	#NULL!	1	0	0	#NULL!	4
0	6	0	1	23.8754	0	0	0	0	0	#NULL!	#NULL!	#NULL!	1	0	0	#NULL!	3
0	7	0	2	23.8754	0	0	0	0	0	#NULL!	#NULL!	#NULL!	1	0	0	#NULL!	3
0	6	0	2	23.8754	0	0	0	0	0	#NULL!	#NULL!	#NULL!	1	0	0	#NULL!	3
0	12	0	3	23.8912	0	0	0	0	0	#NULL!	#NULL!	#NULL!	1	0	0	#NULL!	3
1	14	1	2	23.9249	0	0	0	0	0	#NULL!	#NULL!	#NULL!	1	0	0	#NULL!	4
0	7	1	3	23.9361	0	0	1	0	1	0	1	1	0	0	0	#NULL!	2
0	6	0	2	23.939	0	0	0	0	0	#NULL!	#NULL!	#NULL!	1	0	0	#NULL!	3
0	9	0	2	23.9512	0	0	0	0	0	#NULL!	#NULL!	#NULL!	1	0	0	#NULL!	1
1	9	0	3	23.9591	0	0	1	0	1	0	1	1	0	0	0	#NULL!	2
1	11	0	2	23.9995	0	0	0	0	0	#NULL!	#NULL!	#NULL!	1	0	0	#NULL!	4
0	6	0	1	24.0238	0	0	0	0	0	#NULL!	#NULL!	#NULL!	1	0	0	#NULL!	3
1	12	0	3	24.0317	0	0	0	0	0	#NULL!	#NULL!	#NULL!	1	0	0	#NULL!	2
1	10	0	3	24.0317	0	0	0	0	0	#NULL!	#NULL!	#NULL!	1	0	0	#NULL!	4
0	15	1	3	24.0346	0	0	0	0	0	#NULL!	#NULL!	#NULL!	1	0	0	#NULL!	4
1	11	0	3	24.0741	0	0	0	0	0	#NULL!	#NULL!	#NULL!	1	0	0	#NULL!	4
1	11	0	3	24.0741	1	1	0	0	1	0	0	1	0	0	0	#NULL!	4
0	12	0	2	24.0882	0	0	0	0	0	#NULL!	#NULL!	#NULL!	1	0	0	#NULL!	4
0	11	0	3	24.0882	0	0	0	0	0	#NULL!	#NULL!	#NULL!	1	0	0	#NULL!	4
0	9	0	2	24.093	0	0	0	0	0	#NULL!	#NULL!	#NULL!	1	0	0	#NULL!	4
0	9	0	2	24.1217	0	0	0	0	0	#NULL!	#NULL!	#NULL!	1	0	0	#NULL!	4
1	9	0	3	24.1517	0	0	0	0	0	#NULL!	#NULL!	#NULL!	1	0	0	#NULL!	2
0	13	1	3	24.1522	0	0	0	0	0	#NULL!	#NULL!	#NULL!	1	0	0	#NULL!	4
0	10	0	2	24.1672	0	0	0	0	0	#NULL!	#NULL!	#NULL!	1	0	0	#NULL!	1
1	12	0	3	24.187	0	0	0	0	0	#NULL!	#NULL!	#NULL!	1	0	0	#NULL!	2
0	10	0	2	24.2187	0	0	0	0	0	#NULL!	#NULL!	#NULL!	1	0	0	#NULL!	4
1	13	0	1	24.2215	0	0	0	0	0	#NULL!	#NULL!	#NULL!	1	0	0	#NULL!	4
1	6	0	1	24.2215	0	0	0	0	0	#NULL!	#NULL!	#NULL!	1	0	0	#NULL!	4
0	10	0	2	24.2215	0	0	0	0	0	#NULL!	#NULL!	#NULL!	1	0	0	#NULL!	4
0	4	0	1	24.2382	0	0	0	0	0	#NULL!	#NULL!	#NULL!	1	0	0	#NULL!	3
0	14	1	3	24.3012	0	0	0	0	0	0	#NULL!	#NULL!	1	0	0	#NULL!	4
1	8	0	1	24.3025	0	0	0	0	0	#NULL!	#NULL!	#NULL!	1	0	0	#NULL!	4
0	14	1	3	24.3141	1	1	0	0	1	0	1	2	0	0	0	#NULL!	1
0	10	0	2	24.3375	0	0	0	0	0	#NULL!	#NULL!	#NULL!	1	0	0	#NULL!	4
0	13	0	3	24.3375	0	0	0	0	0	#NULL!	#NULL!	#NULL!	1	0	0	#NULL!	4
1	8	0	1	24.3375	0	0	0	0	0	0	#NULL!	#NULL!	1	0	0	#NULL!	4
0	7	0	1	24.3418	0	0	0	0	0	#NULL!	#NULL!	#NULL!	1	0	0	#NULL!	4
1	8	0	2	24.3767	0	0	0	0	0	#NULL!	#NULL!	#NULL!	1	0	0	#NULL!	1
0	10	0	2	24.3824	0	0	0	0	0	#NULL!	#NULL!	#NULL!	1	0	0	#NULL!	4
0	12	1	2	24.3824	0	0	0	0	0	#NULL!	#NULL!	#NULL!	1	0	0	#NULL!	4
1	9	0	3	24.4418	0	0	0	0	0	#NULL!	#NULL!	#NULL!	1	0	0	#NULL!	2
1	8	0	2	24.4418	0	0	0	0	0	#NULL!	#NULL!	#NULL!	1	0	0	#NULL!	4
1	8	0	3	24.4473	0	0	0	0	0	#NULL!	#NULL!	#NULL!	1	0	0	#NULL!	2
0	9	0	2	24.4561	0	0	0	0	0	#NULL!	#NULL!	#NULL!	1	0	0	#NULL!	4
0	12	0	3	24.4646	0	0	1	0	1	0	1	2	0	0	0	#NULL!	2
0	9	0	1	24.5089	0	0	0	0	0	#NULL!	#NULL!	#NULL!	1	0	0	#NULL!	4
0	10	0	1	24.5089	0	0	0	0	0	#NULL!	#NULL!	#NULL!	1	0	0	#NULL!	4
1	10	0	2	24.5351	0	0	0	0	0	#NULL!	#NULL!	#NULL!	1	0	0	#NULL!	4
1	10	0	3	24.5351	0	0	0	0	0	#NULL!	#NULL!	#NULL!	1	0	0	#NULL!	4
0	12	0	2	24.5675	0	0	0	0	0	#NULL!	#NULL!	#NULL!	1	0	0	#NULL!	4
1	13	0	2	24.5675	0	0	0	0	0	0	#NULL!	#NULL!	1	0	0	#NULL!	4
1	12	1	3	24.5693	0	0	0	0	0	#NULL!	#NULL!	#NULL!	1	0	0	#NULL!	4
1	9	0	3	24.5932	0	0	0	0	0	#NULL!	#NULL!	#NULL!	1	0	0	#NULL!	2
1	5	0	1	24.5932	0	0	0	0	0	#NULL!	#NULL!	#NULL!	1	0	0	#NULL!	4
0	11	0	2	24.6097	0	0	0	0	0	#NULL!	#NULL!	#NULL!	1	0	0	#NULL!	3
0	15	0	2	24.6097	0	0	0	0	0	#NULL!	#NULL!	#NULL!	1	0	0	#NULL!	4
1	10	0	3	24.6633	0	0	1	0	1	0	1	1	0	0	0	#NULL!	2
1	9	0	3	24.6755	1	1	1	0	1	0	2	2	0	0	0	#NULL!	2
1	8	0	3	24.6914	0	0	0	0	0	#NULL!	#NULL!	#NULL!	1	0	0	#NULL!	2
1	10	0	3	24.6914	0	0	0	0	0	#NULL!	#NULL!	#NULL!	1	0	0	#NULL!	2
1	11	0	2	24.7409	0	0	0	0	0	#NULL!	#NULL!	#NULL!	1	0	0	#NULL!	4
1	8	0	2	24.7676	0	0	0	0	0	#NULL!	#NULL!	#NULL!	1	0	0	#NULL!	4
0	13	1	2	24.7676	0	0	0	0	0	#NULL!	#NULL!	#NULL!	1	0	0	#NULL!	4
1	13	1	3	24.7721	0	0	0	0	0	#NULL!	#NULL!	#NULL!	1	0	0	#NULL!	4
1	14	1	2	24.7721	0	0	0	0	0	#NULL!	#NULL!	#NULL!	1	0	0	#NULL!	4
1	10	0	1	24.7843	0	0	0	0	0	#NULL!	#NULL!	#NULL!	1	0	0	#NULL!	4
0	10	0	1	24.8016	0	0	0	0	0	#NULL!	#NULL!	#NULL!	1	0	0	#NULL!	4
0	13	0	2	24.8016	0	0	0	0	0	#NULL!	#NULL!	#NULL!	1	0	0	#NULL!	4
0	9	0	2	24.841	0	0	0	0	0	#NULL!	#NULL!	#NULL!	1	0	0	#NULL!	1
0	7	0	1	24.858	0	0	0	0	0	#NULL!	#NULL!	#NULL!	1	0	0	#NULL!	4
1	10	0	2	24.8971	0	0	0	0	0	#NULL!	#NULL!	#NULL!	1	0	0	#NULL!	4
1	13	0	2	18.6111	1	0	0	0	1	2	1	4	0	1	0	#NULL!	1
1	13	1	3	18.992	1	1	0	0	1	2	1	4	0	1	0	#NULL!	4
0	11	1	2	19.052	0	0	0	0	1	2	0	3	0	1	0	#NULL!	4
0	11	0	1	19.052	1	1	0	0	1	2	2	5	0	1	0	#NULL!	1
0	8	0	3	19.2222	0	0	0	0	1	2	1	3	0	1	0	#NULL!	1
0	14	1	3	19.3337	0	0	0	0	1	2	0	3	0	1	0	#NULL!	4
0	14	1	2	19.3949	1	1	0	0	1	2	1	4	0	1	0	#NULL!	4
0	11	0	2	19.5918	0	0	0	0	1	2	1	4	0	1	0	#NULL!	3
1	15	1	3	19.5918	0	1	0	0	1	2	3	6	0	1	0	#NULL!	4
0	10	0	2	19.5965	0	0	0	0	1	2	1	3	0	1	0	#NULL!	3
0	10	0	2	19.5965	1	1	0	0	1	2	1	3	0	1	0	#NULL!	1
0	11	0	2	19.7055	0	0	0	0	1	2	0	3	0	1	0	#NULL!	4
0	13	1	3	19.7055	1	1	0	0	1	2	2	5	0	1	0	#NULL!	1
0	15	0	2	19.721	0	0	0	0	1	2	1	4	0	1	0	#NULL!	4
1	13	1	3	20.0692	1	1	0	0	1	2	1	4	0	1	0	#NULL!	4
0	11	0	2	20.0796	0	0	0	0	1	2	0	3	0	1	0	#NULL!	4
0	11	0	3	20.1143	0	0	0	0	1	2	2	5	0	1	0	#NULL!	1
1	11	0	3	20.1607	0	0	1	0	1	2	2	5	0	1	0	#NULL!	2
1	11	1	3	20.1929	0	1	0	0	1	2	1	4	0	1	0	#NULL!	1
0	9	0	3	20.202	1	1	0	0	1	2	1	3	0	1	0	#NULL!	1
0	14	1	4	20.202	1	1	0	0	1	2	2	5	0	1	0	#NULL!	4
1	10	0	2	20.2801	1	1	0	0	1	3	2	5	0	1	0	#NULL!	1
0	14	0	2	20.4294	0	0	0	0	1	2	0	3	0	1	0	#NULL!	4
1	4	0	2	20.984	1	1	0	0	1	2	1	3	0	1	0	#NULL!	1
1	13	0	3	21.7664	1	1	0	0	1	2	1	4	0	1	0	#NULL!	1
1	7	0	2	21.7993	1	0	0	0	1	1	2	3	0	1	0	#NULL!	1
0	14	1	2	22.5827	0	1	0	0	1	3	1	5	0	1	0	#NULL!	4
1	15	1	3	22.6852	0	1	0	0	1	1	1	3	0	1	0	#NULL!	1
1	11	0	2	23.3844	0	1	0	0	1	1	1	3	0	1	0	#NULL!	1
1	10	1	3	23.6614	0	1	0	0	1	1	1	3	0	1	0	#NULL!	1
1	13	0	3	23.7654	1	1	1	0	1	1	2	4	0	1	0	#NULL!	1
0	11	0	2	23.8281	1	1	0	0	1	2	2	5	0	1	0	#NULL!	1
0	12	0	3	24	1	1	1	0	1	2	1	4	0	1	0	#NULL!	2
0	12	1	2	24.2123	0	1	0	0	1	1	1	3	0	1	0	#NULL!	4
0	10	1	4	24.5536	#NULL!	1	0	1	1	0	3	3	0	1	0	#NULL!	4
0	9	1	2	24.6755	1	1	1	0	1	2	1	3	0	1	0	#NULL!	1
1	10	1	3	24.7138	1	1	0	0	1	3	1	4	0	1	0	#NULL!	1
1	5	0	1	29.9169	0	0	0	0	0	#NULL!	#NULL!	#NULL!	1	0	0	#NULL!	4
1	12	0	3	29.9383	0	0	0	0	0	#NULL!	#NULL!	#NULL!	1	0	0	#NULL!	2
1	12	0	3	25	0	0	0	0	0	#NULL!	#NULL!	#NULL!	1	0	0	#NULL!	1
1	10	0	3	25	0	0	1	0	1	0	2	2	0	0	0	#NULL!	2
1	9	0	3	25.0135	0	0	0	0	0	#NULL!	#NULL!	#NULL!	1	0	0	#NULL!	2
0	2	0	2	25.0386	0	0	0	0	0	#NULL!	#NULL!	#NULL!	1	0	0	#NULL!	1
0	11	0	2	25.0399	1	0	0	0	1	0	0	1	0	0	0	#NULL!	4
1	11	0	3	25.0574	0	0	0	0	0	#NULL!	#NULL!	#NULL!	1	0	0	#NULL!	2
1	12	0	2	25.0574	0	0	0	0	0	#NULL!	#NULL!	#NULL!	1	0	0	#NULL!	4
0	13	0	2	25.0657	0	0	0	0	0	#NULL!	#NULL!	#NULL!	1	0	0	#NULL!	4
0	9	0	2	25.0762	0	0	0	0	0	#NULL!	#NULL!	#NULL!	1	0	0	#NULL!	4
0	14	0	2	25.0762	0	0	0	0	0	#NULL!	#NULL!	#NULL!	1	0	0	#NULL!	4
0	10	0	3	25.0762	0	0	0	0	0	#NULL!	#NULL!	#NULL!	1	0	0	#NULL!	1
1	12	0	2	25.0811	0	0	0	0	0	#NULL!	#NULL!	#NULL!	1	0	0	#NULL!	1
0	4	1	2	25.0995	0	0	0	0	0	#NULL!	#NULL!	#NULL!	1	0	0	#NULL!	1
1	10	0	3	25.1429	0	0	1	0	1	0	1	1	0	0	0	#NULL!	2
0	11	0	2	25.1486	0	0	0	0	0	#NULL!	#NULL!	#NULL!	1	0	0	#NULL!	4
0	10	0	3	25.1486	0	1	1	0	1	0	1	2	0	0	0	#NULL!	2
0	9	0	2	25.204	0	0	0	0	0	#NULL!	#NULL!	#NULL!	1	0	0	#NULL!	1
0	10	0	1	25.2174	0	0	0	0	0	#NULL!	#NULL!	#NULL!	1	0	0	#NULL!	4
1	12	0	3	25.3086	0	0	0	0	0	#NULL!	#NULL!	#NULL!	1	0	0	#NULL!	4
0	9	0	2	25.3444	0	0	0	0	0	#NULL!	#NULL!	#NULL!	1	0	0	#NULL!	4
1	12	0	3	25.3515	0	0	0	0	0	#NULL!	#NULL!	#NULL!	1	0	0	#NULL!	2
0	8	1	2	25.3906	0	0	0	0	0	#NULL!	#NULL!	#NULL!	1	0	0	#NULL!	3
0	10	0	3	25.3906	1	0	0	0	1	0	0	0	0	0	0	#NULL!	3
1	8	0	4	25.3934	0	0	0	0	0	#NULL!	#NULL!	#NULL!	1	0	0	#NULL!	1
1	9	0	2	25.3934	0	0	0	0	0	#NULL!	#NULL!	#NULL!	1	0	0	#NULL!	4
1	10	0	3	25.3934	0	0	0	0	0	#NULL!	#NULL!	#NULL!	1	0	0	#NULL!	2
1	13	0	2	25.4055	0	0	0	0	0	#NULL!	#NULL!	#NULL!	1	0	0	#NULL!	4
0	12	0	1	25.4581	0	0	0	0	0	#NULL!	#NULL!	#NULL!	1	0	0	#NULL!	4
1	8	0	3	25.464	0	1	0	0	1	1	1	2	0	0	0	#NULL!	2
1	11	0	3	25.4694	0	0	0	0	0	#NULL!	#NULL!	#NULL!	1	0	0	#NULL!	4
0	5	0	2	25.4779	0	0	0	0	0	#NULL!	#NULL!	#NULL!	1	0	0	#NULL!	3
1	8	0	3	25.5036	0	0	0	0	0	#NULL!	#NULL!	#NULL!	1	0	0	#NULL!	2
0	9	0	2	25.5036	0	0	0	0	0	#NULL!	#NULL!	#NULL!	1	0	0	#NULL!	4
0	9	0	1	25.5036	0	0	0	0	0	#NULL!	#NULL!	#NULL!	1	0	0	#NULL!	4
1	12	0	4	25.5036	0	0	0	0	0	#NULL!	#NULL!	#NULL!	1	0	0	#NULL!	4
0	11	0	2	25.5102	0	0	0	0	0	#NULL!	#NULL!	#NULL!	1	0	0	#NULL!	4
0	10	0	2	25.5102	0	0	0	0	0	#NULL!	#NULL!	#NULL!	1	0	0	#NULL!	4
1	10	0	2	25.5354	0	0	0	0	0	#NULL!	#NULL!	#NULL!	1	0	0	#NULL!	4
0	6	0	2	25.5593	0	0	0	0	0	#NULL!	#NULL!	#NULL!	1	0	0	#NULL!	3
0	6	0	1	25.5593	0	0	0	0	0	#NULL!	#NULL!	#NULL!	1	0	0	#NULL!	4
0	10	0	2	25.6055	0	0	0	0	0	#NULL!	#NULL!	#NULL!	1	0	0	#NULL!	4
1	11	0	2	25.6402	0	0	0	0	0	#NULL!	#NULL!	#NULL!	1	0	0	#NULL!	4
1	8	0	2	25.6489	0	0	0	0	0	#NULL!	#NULL!	#NULL!	1	0	0	#NULL!	4
1	10	0	3	25.6801	0	0	1	0	1	0	1	1	0	0	0	#NULL!	2
1	12	0	2	25.6896	0	0	0	0	0	#NULL!	#NULL!	#NULL!	1	0	0	#NULL!	4
0	9	0	2	25.711	0	0	0	0	0	#NULL!	#NULL!	#NULL!	1	0	0	#NULL!	4
0	10	0	1	25.7117	0	0	0	0	0	#NULL!	#NULL!	#NULL!	1	0	0	#NULL!	4
0	10	0	3	25.7117	0	0	0	0	0	#NULL!	#NULL!	#NULL!	1	0	0	#NULL!	4
0	14	1	3	25.7117	0	0	0	0	0	0	#NULL!	#NULL!	1	0	0	#NULL!	1
0	14	1	3	25.7117	0	0	0	0	0	#NULL!	#NULL!	#NULL!	1	0	0	#NULL!	4
0	1	0	1	25.7276	0	0	0	0	0	#NULL!	#NULL!	#NULL!	1	0	0	#NULL!	1
1	10	0	2	25.7276	0	0	0	0	0	#NULL!	#NULL!	#NULL!	1	0	0	#NULL!	4
1	10	0	2	25.7371	0	0	0	0	0	#NULL!	#NULL!	#NULL!	1	0	0	#NULL!	4
1	9	0	1	25.7618	0	0	0	0	0	#NULL!	#NULL!	#NULL!	1	0	0	#NULL!	1
1	9	0	2	25.7618	0	0	0	0	0	#NULL!	#NULL!	#NULL!	1	0	0	#NULL!	4
1	12	0	2	25.763	0	0	0	0	0	#NULL!	#NULL!	#NULL!	1	0	0	#NULL!	4
0	13	1	3	25.7812	0	0	0	0	0	#NULL!	#NULL!	#NULL!	1	0	0	#NULL!	4
1	9	0	3	25.7959	1	0	1	0	1	0	1	1	0	0	0	#NULL!	2
1	8	0	2	25.8166	1	1	0	0	1	1	1	2	0	0	0	#NULL!	1
0	7	0	2	25.8645	0	0	0	0	0	#NULL!	#NULL!	#NULL!	1	0	0	#NULL!	4
0	7	0	1	25.8645	0	0	0	0	0	#NULL!	#NULL!	#NULL!	1	0	0	#NULL!	4
1	6	0	1	25.8806	0	0	0	0	0	#NULL!	#NULL!	#NULL!	1	0	0	#NULL!	4
1	10	0	3	25.8806	0	0	0	0	0	#NULL!	#NULL!	#NULL!	1	0	0	#NULL!	4
1	9	0	3	25.9043	0	0	0	0	0	#NULL!	#NULL!	#NULL!	1	0	1	#NULL!	2
1	12	0	2	25.9516	0	0	0	0	0	#NULL!	#NULL!	#NULL!	1	0	0	#NULL!	4
1	13	0	3	25.963	0	0	0	0	0	#NULL!	#NULL!	#NULL!	1	0	0	#NULL!	4
0	9	0	2	25.9701	0	0	0	0	0	#NULL!	#NULL!	#NULL!	1	0	0	#NULL!	4
0	10	0	2	25.9701	0	0	0	0	0	#NULL!	#NULL!	#NULL!	1	0	0	#NULL!	4
0	9	0	2	25.9909	0	0	0	0	0	#NULL!	#NULL!	#NULL!	1	0	0	#NULL!	4
1	9	0	2	25.9924	0	0	0	0	0	#NULL!	#NULL!	#NULL!	1	0	0	#NULL!	4
1	13	0	#NULL!	26.0044	0	0	0	0	0	#NULL!	#NULL!	#NULL!	1	0	0	#NULL!	1
0	8	0	3	26.0262	0	0	0	0	0	#NULL!	#NULL!	#NULL!	1	0	0	#NULL!	2
1	8	0	1	26.0276	0	0	0	0	0	#NULL!	#NULL!	#NULL!	1	0	0	#NULL!	4
1	12	0	2	26.0276	0	0	0	0	0	#NULL!	#NULL!	#NULL!	1	0	0	#NULL!	4
0	12	0	1	26.0276	0	0	0	0	0	#NULL!	#NULL!	#NULL!	1	0	0	#NULL!	4
0	14	1	2	26.0375	0	0	0	0	0	0	1	2	0	0	0	#NULL!	4
0	9	0	2	26.079	0	0	0	0	0	#NULL!	#NULL!	#NULL!	1	0	0	#NULL!	1
0	9	0	1	26.0933	0	0	0	0	0	#NULL!	#NULL!	#NULL!	1	0	0	#NULL!	4
0	11	0	2	26.1286	0	0	0	0	0	#NULL!	#NULL!	#NULL!	1	0	0	#NULL!	4
1	9	0	3	26.1962	0	0	0	0	0	#NULL!	#NULL!	#NULL!	1	0	0	#NULL!	2
1	6	0	3	26.1962	0	0	0	0	0	#NULL!	#NULL!	#NULL!	1	0	0	#NULL!	2
1	9	0	3	26.2164	0	0	0	0	0	#NULL!	#NULL!	#NULL!	1	0	0	#NULL!	2
1	8	0	2	26.2164	0	0	0	0	0	#NULL!	#NULL!	#NULL!	1	0	0	#NULL!	4
0	9	0	2	26.2188	0	0	0	0	0	#NULL!	#NULL!	#NULL!	1	0	0	#NULL!	1
1	14	0	3	26.2346	0	0	0	0	0	0	#NULL!	#NULL!	1	0	0	#NULL!	1
1	10	0	3	26.2346	0	0	0	0	0	#NULL!	#NULL!	#NULL!	1	0	0	#NULL!	4
0	8	0	2	26.2596	0	0	0	0	0	#NULL!	#NULL!	#NULL!	1	0	0	#NULL!	4
0	10	0	2	26.2596	0	0	0	0	0	#NULL!	#NULL!	#NULL!	1	0	0	#NULL!	4
0	9	0	2	26.2917	0	0	0	0	0	#NULL!	#NULL!	#NULL!	1	0	0	#NULL!	3
1	11	0	2	26.2966	0	0	0	0	0	#NULL!	#NULL!	#NULL!	1	0	0	#NULL!	4
1	12	0	3	26.2966	0	0	0	0	0	#NULL!	#NULL!	#NULL!	1	0	0	#NULL!	2
0	8	0	2	26.2976	0	0	0	0	0	#NULL!	#NULL!	#NULL!	1	0	0	#NULL!	4
0	12	0	3	26.2985	0	0	0	0	0	#NULL!	#NULL!	#NULL!	1	0	0	#NULL!	4
1	11	0	2	26.3094	0	0	0	0	0	#NULL!	#NULL!	#NULL!	1	0	0	#NULL!	4
0	13	0	2	26.3114	0	0	0	0	0	#NULL!	#NULL!	#NULL!	1	0	0	#NULL!	4
1	5	0	2	26.3151	0	0	0	0	0	#NULL!	#NULL!	#NULL!	1	0	0	#NULL!	1
0	7	0	2	26.3465	0	0	0	0	0	#NULL!	#NULL!	#NULL!	1	0	0	#NULL!	4
0	10	1	3	26.3465	0	0	0	0	0	#NULL!	#NULL!	#NULL!	1	0	0	#NULL!	4
1	9	0	3	26.3958	0	0	1	0	1	0	1	1	0	0	0	#NULL!	2
1	9	0	1	26.4236	0	0	0	0	0	#NULL!	#NULL!	#NULL!	1	0	0	#NULL!	4
1	11	0	3	26.436	1	1	0	0	1	0	1	2	0	0	0	#NULL!	1
0	6	0	2	26.449	0	0	0	0	0	#NULL!	#NULL!	#NULL!	1	0	0	#NULL!	3
1	9	0	2	26.4915	0	0	0	0	0	#NULL!	#NULL!	#NULL!	1	0	0	#NULL!	4
0	10	0	3	26.4915	0	1	0	0	1	1	1	2	0	0	0	#NULL!	4
0	11	0	2	26.5021	0	0	0	0	0	#NULL!	#NULL!	#NULL!	1	0	0	#NULL!	3
1	12	0	2	26.5118	0	0	0	0	0	#NULL!	#NULL!	#NULL!	1	0	0	#NULL!	4
0	5	0	1	26.5338	0	0	0	0	0	#NULL!	#NULL!	#NULL!	1	0	0	#NULL!	3
1	7	0	2	26.5432	0	0	0	0	0	#NULL!	#NULL!	#NULL!	1	0	0	#NULL!	4
1	10	0	3	26.5432	0	0	1	0	1	0	1	1	0	0	0	#NULL!	2
1	12	0	2	26.556	0	0	0	0	0	#NULL!	#NULL!	#NULL!	1	0	0	#NULL!	4
0	14	0	2	26.5625	0	0	0	0	0	#NULL!	#NULL!	#NULL!	1	0	0	#NULL!	4
0	9	0	1	26.5625	0	0	0	0	0	#NULL!	#NULL!	#NULL!	1	0	0	#NULL!	4
1	2	0	2	26.5703	0	0	0	0	0	#NULL!	#NULL!	#NULL!	1	0	0	#NULL!	1
0	7	0	1	26.5731	0	0	0	0	0	#NULL!	#NULL!	#NULL!	1	0	0	#NULL!	3
1	10	0	2	26.5731	0	0	0	0	0	#NULL!	#NULL!	#NULL!	1	0	0	#NULL!	4
1	9	0	2	26.5759	0	0	0	0	0	#NULL!	#NULL!	#NULL!	1	0	0	#NULL!	4
1	14	0	2	26.5832	0	0	0	0	0	#NULL!	#NULL!	#NULL!	1	0	0	#NULL!	4
1	8	0	2	26.5888	1	1	0	0	1	0	1	1	0	0	0	#NULL!	1
0	11	0	3	26.6193	0	0	0	0	0	#NULL!	#NULL!	#NULL!	1	0	0	#NULL!	3
0	11	0	3	26.6728	0	0	0	0	0	#NULL!	#NULL!	#NULL!	1	0	0	#NULL!	2
1	12	0	2	26.6749	0	0	0	0	0	#NULL!	#NULL!	#NULL!	1	0	0	#NULL!	4
1	14	0	2	26.7539	0	0	0	0	0	#NULL!	#NULL!	#NULL!	1	0	0	#NULL!	4
0	6	0	1	26.7949	0	0	0	0	0	#NULL!	#NULL!	#NULL!	1	0	0	#NULL!	4
1	6	0	1	26.8122	0	0	0	0	0	#NULL!	#NULL!	#NULL!	1	0	0	#NULL!	4
1	9	0	3	26.8274	0	0	1	0	1	0	1	1	0	0	0	#NULL!	2
0	8	0	2	26.8316	0	0	0	0	0	#NULL!	#NULL!	#NULL!	1	0	0	#NULL!	3
1	11	0	4	26.8385	1	0	0	0	1	0	1	2	0	0	0	#NULL!	1
1	13	0	2	26.8785	0	0	0	0	0	#NULL!	#NULL!	#NULL!	1	0	0	#NULL!	4
1	9	0	3	26.8817	0	0	0	0	0	#NULL!	#NULL!	#NULL!	1	0	0	#NULL!	4
1	1	0	1	26.8923	0	0	0	0	0	#NULL!	#NULL!	#NULL!	1	0	0	#NULL!	4
0	12	0	2	26.8923	0	0	0	0	0	#NULL!	#NULL!	#NULL!	1	0	0	#NULL!	4
0	12	1	2	26.9274	0	0	0	0	0	#NULL!	#NULL!	#NULL!	1	0	0	#NULL!	4
1	8	1	2	26.9395	1	1	0	0	1	0	1	1	0	0	0	#NULL!	1
1	13	0	3	26.9896	0	0	0	0	0	#NULL!	#NULL!	#NULL!	1	0	0	#NULL!	4
0	9	0	1	26.9896	0	0	0	0	0	#NULL!	#NULL!	#NULL!	1	0	0	#NULL!	4
0	10	0	1	27.0051	0	0	0	0	0	#NULL!	#NULL!	#NULL!	1	0	0	#NULL!	4
1	9	0	3	27.0197	0	0	1	0	1	0	1	1	0	0	0	#NULL!	2
0	8	0	3	27.0538	0	0	0	0	0	#NULL!	#NULL!	#NULL!	1	0	0	#NULL!	2
0	10	0	2	27.0641	0	0	0	0	0	#NULL!	#NULL!	#NULL!	1	0	0	#NULL!	4
1	10	1	3	27.0641	0	0	1	0	1	0	1	1	0	0	0	#NULL!	2
0	7	0	2	27.0993	0	0	0	0	0	#NULL!	#NULL!	#NULL!	1	0	0	#NULL!	4
0	14	1	3	27.1041	0	0	0	0	0	#NULL!	#NULL!	#NULL!	1	0	0	#NULL!	4
0	9	0	2	27.1111	0	0	0	0	0	#NULL!	#NULL!	#NULL!	1	0	0	#NULL!	4
0	11	0	2	27.1203	0	0	0	0	0	#NULL!	#NULL!	#NULL!	1	0	0	#NULL!	4
0	9	0	2	27.1416	0	0	0	0	0	#NULL!	#NULL!	#NULL!	1	0	0	#NULL!	4
1	11	0	3	27.1605	0	0	0	0	0	#NULL!	#NULL!	#NULL!	1	0	0	#NULL!	4
1	10	1	4	27.1706	0	0	1	0	1	0	1	1	0	0	0	#NULL!	2
1	11	0	3	27.1708	0	0	0	0	0	#NULL!	#NULL!	#NULL!	1	0	0	#NULL!	1
0	9	0	2	27.2173	0	0	0	0	0	0	#NULL!	#NULL!	1	0	0	#NULL!	4
1	11	0	3	27.2316	0	0	0	0	0	#NULL!	#NULL!	#NULL!	1	0	0	#NULL!	4
0	8	0	1	27.2817	0	0	0	0	0	#NULL!	#NULL!	#NULL!	1	0	0	#NULL!	3
1	12	0	2	27.2817	0	0	0	0	0	#NULL!	#NULL!	#NULL!	1	0	0	#NULL!	4
1	8	0	3	27.2817	0	0	0	0	0	#NULL!	#NULL!	#NULL!	1	0	0	#NULL!	2
0	15	1	3	27.3437	0	0	0	0	0	#NULL!	#NULL!	#NULL!	1	0	0	#NULL!	4
1	11	0	3	27.3797	0	0	0	0	0	#NULL!	#NULL!	#NULL!	1	0	0	#NULL!	2
1	7	0	3	27.3797	0	0	1	0	1	0	1	1	0	0	0	#NULL!	2
1	8	0	3	27.4115	0	0	0	0	0	#NULL!	#NULL!	#NULL!	1	0	0	#NULL!	2
0	8	1	1	27.4302	0	0	0	0	0	#NULL!	#NULL!	#NULL!	1	0	1	#NULL!	1
1	9	0	3	27.4406	0	0	0	0	0	#NULL!	#NULL!	#NULL!	1	0	0	#NULL!	2
0	7	0	1	27.4506	0	0	0	0	0	#NULL!	#NULL!	#NULL!	1	0	0	#NULL!	4
1	6	0	3	27.4529	0	0	0	0	0	#NULL!	#NULL!	#NULL!	1	0	0	#NULL!	2
1	9	0	2	27.4648	0	0	0	0	0	#NULL!	#NULL!	#NULL!	1	0	0	#NULL!	4
0	12	0	2	27.4756	0	0	0	0	0	3	#NULL!	#NULL!	1	0	0	#NULL!	1
0	14	0	2	27.4762	0	0	0	0	0	#NULL!	#NULL!	#NULL!	1	0	0	#NULL!	4
0	6	1	1	27.5482	0	0	0	0	0	#NULL!	#NULL!	#NULL!	1	0	1	#NULL!	1
0	9	0	2	27.6817	0	0	0	0	0	#NULL!	#NULL!	#NULL!	1	0	0	#NULL!	4
0	7	0	2	27.7008	0	0	0	0	0	#NULL!	#NULL!	#NULL!	1	0	0	#NULL!	4
1	10	0	2	27.7177	0	0	0	0	0	#NULL!	#NULL!	#NULL!	1	0	0	#NULL!	4
1	11	0	3	27.7177	0	0	0	0	0	#NULL!	#NULL!	#NULL!	1	0	0	#NULL!	4
1	11	0	2	27.7447	0	0	0	0	0	#NULL!	#NULL!	#NULL!	1	0	0	#NULL!	4
1	11	0	3	27.7447	0	0	0	0	0	0	#NULL!	#NULL!	1	0	0	#NULL!	2
0	10	0	2	27.7634	0	0	0	0	0	#NULL!	#NULL!	#NULL!	1	0	0	#NULL!	4
1	12	0	2	27.7743	0	0	0	0	0	#NULL!	#NULL!	#NULL!	1	0	0	#NULL!	4
0	11	0	2	27.7767	0	0	0	0	0	0	#NULL!	#NULL!	1	0	0	#NULL!	4
1	9	0	2	27.7778	0	0	0	0	0	#NULL!	#NULL!	#NULL!	1	0	0	#NULL!	4
0	13	1	2	27.8159	0	0	0	0	0	#NULL!	#NULL!	#NULL!	1	0	0	#NULL!	4
0	6	0	2	27.8159	0	0	0	0	0	#NULL!	#NULL!	#NULL!	1	0	0	#NULL!	4
1	9	0	3	27.8852	0	0	0	0	0	#NULL!	#NULL!	#NULL!	1	0	0	#NULL!	2
0	12	0	2	27.8852	0	0	0	0	0	#NULL!	#NULL!	#NULL!	1	0	0	#NULL!	4
0	10	0	2	27.9431	0	0	0	0	0	#NULL!	#NULL!	#NULL!	1	0	0	#NULL!	4
0	12	0	2	27.9904	0	0	0	0	0	#NULL!	#NULL!	#NULL!	1	0	0	#NULL!	4
1	10	0	3	27.9904	0	0	1	0	1	0	2	2	0	0	0	#NULL!	2
0	14	0	3	28	0	0	0	0	0	#NULL!	#NULL!	#NULL!	1	0	0	#NULL!	4
0	9	0	2	28.0102	0	0	0	0	0	#NULL!	#NULL!	#NULL!	1	0	0	#NULL!	4
0	10	1	3	28.0339	0	1	0	0	1	1	1	2	0	0	0	#NULL!	4
0	9	0	3	28.0404	0	0	0	0	0	#NULL!	#NULL!	#NULL!	1	0	0	#NULL!	4
1	12	0	3	28.0497	1	1	0	0	1	0	1	2	0	0	0	#NULL!	2
1	7	0	3	28.06	0	0	1	0	1	0	1	1	0	0	0	#NULL!	2
0	7	0	2	28.0664	0	0	0	0	0	#NULL!	#NULL!	#NULL!	1	0	0	#NULL!	4
1	9	0	3	28.0664	0	0	1	0	1	0	1	1	0	0	0	#NULL!	2
1	6	0	2	28.0763	0	0	0	0	0	#NULL!	#NULL!	#NULL!	1	0	0	#NULL!	1
1	10	0	1	28.0863	0	0	0	0	0	#NULL!	#NULL!	#NULL!	1	0	0	#NULL!	4
1	11	0	2	28.0863	0	0	0	0	0	0	#NULL!	#NULL!	1	0	0	#NULL!	4
0	11	0	2	28.0863	0	0	0	0	0	#NULL!	#NULL!	#NULL!	1	0	0	#NULL!	4
1	10	0	3	28.0864	0	0	0	0	0	#NULL!	#NULL!	#NULL!	1	0	0	#NULL!	4
1	8	0	2	28.0899	0	0	0	0	0	#NULL!	#NULL!	#NULL!	1	0	0	#NULL!	4
1	8	0	2	28.0899	0	0	0	0	0	#NULL!	#NULL!	#NULL!	1	0	0	#NULL!	4
1	7	0	3	28.0899	0	0	1	0	1	0	2	2	0	0	0	#NULL!	2
0	8	0	2	28.125	0	0	0	0	0	#NULL!	#NULL!	#NULL!	1	0	0	#NULL!	4
1	8	0	3	28.1741	0	0	0	0	0	#NULL!	#NULL!	#NULL!	1	0	0	#NULL!	2
0	10	0	2	28.257	0	0	0	0	0	#NULL!	#NULL!	#NULL!	1	0	0	#NULL!	4
0	6	0	2	28.3039	0	0	0	0	0	#NULL!	#NULL!	#NULL!	1	0	0	#NULL!	4
0	8	0	2	28.3039	0	0	0	0	0	#NULL!	#NULL!	#NULL!	1	0	0	#NULL!	4
0	9	0	1	28.306	0	0	0	0	0	#NULL!	#NULL!	#NULL!	1	0	0	#NULL!	4
0	11	0	2	28.3266	0	0	0	0	0	#NULL!	#NULL!	#NULL!	1	0	0	#NULL!	4
0	8	0	2	28.3266	0	0	0	0	0	#NULL!	#NULL!	#NULL!	1	0	0	#NULL!	4
1	14	0	3	28.3266	0	0	0	0	0	#NULL!	#NULL!	#NULL!	1	0	0	#NULL!	4
0	8	0	2	28.3447	0	0	0	0	0	#NULL!	#NULL!	#NULL!	1	0	0	#NULL!	4
0	11	0	2	28.3447	1	0	0	0	1	0	0	1	0	0	0	#NULL!	4
1	8	0	2	28.3675	0	0	0	0	0	#NULL!	#NULL!	#NULL!	1	0	0	#NULL!	4
0	11	0	3	28.3737	0	0	0	0	0	#NULL!	#NULL!	#NULL!	1	0	0	#NULL!	1
1	10	0	3	28.3782	0	1	1	0	1	0	1	2	0	0	0	#NULL!	2
0	5	0	1	28.3848	0	0	0	0	0	#NULL!	#NULL!	#NULL!	1	0	0	#NULL!	4
0	13	0	2	28.3937	0	0	0	0	0	#NULL!	#NULL!	#NULL!	1	0	0	#NULL!	4
1	12	0	3	28.3937	1	1	0	0	1	0	1	2	0	0	0	#NULL!	2
1	8	0	2	28.4005	0	0	0	0	0	#NULL!	#NULL!	#NULL!	1	0	0	#NULL!	4
1	9	0	3	28.4011	0	0	1	0	1	0	1	1	0	0	0	#NULL!	2
1	9	0	3	28.4082	0	0	0	0	0	#NULL!	#NULL!	#NULL!	1	0	0	#NULL!	4
1	11	0	3	28.4091	0	0	0	0	0	#NULL!	#NULL!	#NULL!	1	0	0	#NULL!	4
0	15	0	2	28.5156	0	0	0	0	0	#NULL!	#NULL!	#NULL!	1	0	0	#NULL!	4
0	12	0	2	28.5156	0	0	0	0	0	#NULL!	#NULL!	#NULL!	1	0	0	#NULL!	4
0	11	0	2	28.5483	0	0	0	0	0	#NULL!	#NULL!	#NULL!	1	0	0	#NULL!	4
1	8	0	1	28.5546	0	0	0	0	0	#NULL!	#NULL!	#NULL!	1	0	0	#NULL!	4
0	9	0	2	28.5665	0	0	0	0	0	#NULL!	#NULL!	#NULL!	1	0	0	#NULL!	4
0	8	0	2	28.578	0	0	0	0	0	#NULL!	#NULL!	#NULL!	1	0	0	#NULL!	4
0	14	1	2	28.578	0	0	0	0	0	#NULL!	#NULL!	#NULL!	1	0	0	#NULL!	4
0	12	0	2	28.578	0	0	0	0	0	#NULL!	#NULL!	#NULL!	1	0	0	#NULL!	4
0	11	0	2	28.6048	0	0	0	0	0	#NULL!	#NULL!	#NULL!	1	0	0	#NULL!	4
0	11	0	2	28.6501	0	0	0	0	0	#NULL!	#NULL!	#NULL!	1	0	0	#NULL!	4
0	12	0	1	28.6689	0	0	0	0	0	#NULL!	#NULL!	#NULL!	1	0	0	#NULL!	4
1	10	0	2	28.6927	0	0	0	0	0	#NULL!	#NULL!	#NULL!	1	0	0	#NULL!	4
1	11	0	#NULL!	28.7037	0	0	0	0	0	0	#NULL!	#NULL!	1	0	0	#NULL!	4
0	5	0	1	28.7105	0	0	0	0	0	#NULL!	#NULL!	#NULL!	1	0	0	#NULL!	3
0	10	0	2	28.7201	0	0	0	0	0	#NULL!	#NULL!	#NULL!	1	0	0	#NULL!	4
1	8	0	3	28.7211	0	0	0	0	0	#NULL!	#NULL!	#NULL!	1	0	0	#NULL!	2
1	9	0	2	28.7317	0	0	0	0	0	0	#NULL!	#NULL!	1	0	0	#NULL!	4
0	10	0	2	28.7319	0	0	0	0	0	#NULL!	#NULL!	#NULL!	1	0	0	#NULL!	4
1	7	0	2	28.7347	0	0	0	0	0	#NULL!	#NULL!	#NULL!	1	0	0	#NULL!	4
1	6	0	2	28.7821	0	0	0	0	0	#NULL!	#NULL!	#NULL!	1	0	0	#NULL!	4
0	6	0	1	28.8415	0	0	0	0	0	#NULL!	#NULL!	#NULL!	1	0	0	#NULL!	3
1	9	0	3	28.9461	1	0	0	0	1	0	1	1	0	0	0	#NULL!	1
0	13	1	2	28.9811	0	0	0	0	0	#NULL!	#NULL!	#NULL!	1	0	0	#NULL!	4
0	10	0	2	28.9811	0	0	0	0	0	#NULL!	#NULL!	#NULL!	1	0	0	#NULL!	4
0	10	0	1	29.0006	0	0	0	0	0	#NULL!	#NULL!	#NULL!	1	0	0	#NULL!	4
1	9	0	2	29.0253	0	0	0	0	0	#NULL!	#NULL!	#NULL!	1	0	0	#NULL!	4
1	11	0	1	29.0253	0	0	0	0	0	#NULL!	#NULL!	#NULL!	1	0	0	#NULL!	4
1	8	0	2	29.0367	0	0	1	0	1	0	1	1	0	0	0	#NULL!	2
1	8	0	2	29.0437	0	0	0	0	0	#NULL!	#NULL!	#NULL!	1	0	0	#NULL!	4
1	10	0	3	29.0466	0	0	1	0	1	0	1	2	0	0	0	#NULL!	2
0	8	0	2	29.0533	0	0	0	0	0	#NULL!	#NULL!	#NULL!	1	0	0	#NULL!	4
1	8	0	3	29.0548	0	0	0	0	0	#NULL!	#NULL!	#NULL!	1	0	0	#NULL!	2
1	9	0	2	29.0548	0	0	0	0	0	#NULL!	#NULL!	#NULL!	1	0	0	#NULL!	1
0	11	0	2	29.0548	0	0	0	0	0	#NULL!	#NULL!	#NULL!	1	0	0	#NULL!	4
1	8	0	2	29.0612	0	0	0	0	0	#NULL!	#NULL!	#NULL!	1	0	0	#NULL!	4
1	10	0	3	29.0688	0	0	0	0	0	#NULL!	#NULL!	#NULL!	1	0	0	#NULL!	2
0	8	0	3	29.1693	0	0	1	0	1	0	1	1	0	0	0	#NULL!	2
0	11	0	2	29.2132	0	0	0	0	0	#NULL!	#NULL!	#NULL!	1	0	0	#NULL!	3
1	10	0	2	29.2839	0	0	0	0	0	#NULL!	#NULL!	#NULL!	1	0	0	#NULL!	4
1	13	0	4	29.3031	0	1	1	0	1	0	1	2	0	0	0	#NULL!	2
0	10	0	2	29.3199	0	0	0	0	0	#NULL!	#NULL!	#NULL!	1	0	0	#NULL!	4
1	9	0	3	29.321	0	0	0	0	0	#NULL!	#NULL!	#NULL!	1	0	0	#NULL!	1
1	8	0	3	29.3524	0	0	1	0	1	0	1	1	0	0	0	#NULL!	2
1	11	1	3	29.3524	1	1	0	0	1	0	1	2	0	0	0	#NULL!	1
0	11	0	3	29.3878	0	0	0	0	0	#NULL!	#NULL!	#NULL!	1	0	0	#NULL!	1
0	3	0	1	29.3962	0	0	0	0	0	0	#NULL!	#NULL!	1	0	0	#NULL!	3
1	10	0	3	29.4029	0	0	0	0	0	#NULL!	#NULL!	#NULL!	1	0	0	#NULL!	2
0	7	0	2	29.4108	0	0	0	0	0	#NULL!	#NULL!	#NULL!	1	0	0	#NULL!	4
0	9	0	2	29.4118	0	0	0	0	0	#NULL!	#NULL!	#NULL!	1	0	0	#NULL!	4
1	9	0	2	29.4293	0	0	0	0	0	#NULL!	#NULL!	#NULL!	1	0	0	#NULL!	1
1	8	0	3	29.5369	0	0	0	0	0	#NULL!	#NULL!	#NULL!	1	0	0	#NULL!	2
0	15	1	3	29.5858	0	0	0	0	0	0	#NULL!	#NULL!	1	0	0	#NULL!	4
1	6	0	2	29.6084	0	0	0	0	0	#NULL!	#NULL!	#NULL!	1	0	0	#NULL!	4
1	11	0	2	29.6084	0	0	0	0	0	#NULL!	#NULL!	#NULL!	1	0	0	#NULL!	4
0	10	0	3	29.6202	0	0	0	0	0	#NULL!	#NULL!	#NULL!	1	0	0	#NULL!	1
0	10	0	2	29.7056	0	0	0	0	0	#NULL!	#NULL!	#NULL!	1	0	0	#NULL!	4
0	15	1	3	29.7056	0	0	0	0	0	#NULL!	#NULL!	#NULL!	1	0	0	#NULL!	4
1	11	0	3	29.708	0	0	0	0	0	#NULL!	#NULL!	#NULL!	1	0	0	#NULL!	4
0	5	0	1	29.7143	0	0	0	0	0	#NULL!	#NULL!	#NULL!	1	0	0	#NULL!	3
0	9	0	2	29.737	0	0	0	0	0	#NULL!	#NULL!	#NULL!	1	0	0	#NULL!	4
1	14	1	3	29.7442	0	0	0	0	0	#NULL!	#NULL!	#NULL!	1	0	0	#NULL!	4
1	9	0	3	29.7576	0	0	0	0	0	#NULL!	#NULL!	#NULL!	1	0	0	#NULL!	2
0	12	1	2	29.7576	0	0	0	0	0	#NULL!	#NULL!	#NULL!	1	0	0	#NULL!	4
0	8	0	1	29.7578	0	0	0	0	0	#NULL!	#NULL!	#NULL!	1	0	0	#NULL!	4
1	10	0	3	29.8028	0	0	0	0	0	#NULL!	#NULL!	#NULL!	1	0	0	#NULL!	2
1	10	0	2	29.8322	0	0	0	0	0	3	#NULL!	#NULL!	1	0	0	#NULL!	4
1	12	1	3	29.8394	0	0	0	0	0	#NULL!	#NULL!	#NULL!	1	0	0	#NULL!	4
0	14	0	2	29.8623	0	0	0	0	0	#NULL!	#NULL!	#NULL!	1	0	0	#NULL!	4
1	7	0	2	25.1429	1	1	0	0	1	2	1	3	0	1	0	#NULL!	1
1	2	0	2	25.2408	0	1	0	0	1	1	2	3	0	1	0	#NULL!	1
1	12	1	3	25.6005	0	1	0	0	1	1	1	3	0	1	0	#NULL!	1
0	12	0	1	25.8264	0	1	0	0	1	1	1	3	0	1	0	#NULL!	1
1	11	0	3	25.9516	0	1	1	0	1	1	1	3	0	1	0	#NULL!	2
1	11	0	3	26.1738	0	1	0	0	1	1	1	3	0	1	0	#NULL!	2
1	12	0	3	26.2773	0	0	1	0	1	0	2	3	0	1	0	#NULL!	2
0	13	0	2	26.2917	1	1	0	0	1	1	2	4	0	1	0	#NULL!	1
1	10	0	2	26.6846	1	1	0	0	1	3	1	4	0	1	0	#NULL!	1
1	9	0	2	26.8274	1	1	0	0	1	3	0	3	0	1	0	#NULL!	4
1	11	1	4	27.3982	1	1	1	0	1	0	3	4	0	1	0	#NULL!	1
1	13	0	3	27.4648	1	1	1	0	1	0	2	3	0	1	0	#NULL!	2
1	12	0	3	27.6165	0	0	1	0	1	0	2	3	0	1	0	#NULL!	2
0	12	0	3	27.6304	1	1	0	0	1	0	2	3	0	1	0	#NULL!	2
1	6	0	3	29.2184	0	0	1	0	1	0	3	3	0	1	0	#NULL!	2
0	11	0	2	29.3848	1	1	0	0	1	2	1	4	0	1	0	#NULL!	1
1	10	0	2	30.0232	0	0	0	0	0	#NULL!	#NULL!	#NULL!	1	0	0	#NULL!	4
1	7	0	1	30.0568	0	0	0	0	0	#NULL!	#NULL!	#NULL!	1	0	0	#NULL!	4
0	11	0	2	30.0621	0	0	0	0	0	#NULL!	#NULL!	#NULL!	1	0	0	#NULL!	4
1	13	0	3	30.0712	0	0	0	0	0	#NULL!	#NULL!	#NULL!	1	0	0	#NULL!	4
1	10	0	2	30.0712	0	0	0	0	0	#NULL!	#NULL!	#NULL!	1	0	0	#NULL!	4
0	12	0	2	30.0781	0	0	0	0	0	#NULL!	#NULL!	#NULL!	1	0	0	#NULL!	4
1	10	0	2	30.0838	0	0	0	0	0	#NULL!	#NULL!	#NULL!	1	0	0	#NULL!	4
0	9	0	2	30.1205	0	0	0	0	0	#NULL!	#NULL!	#NULL!	1	0	0	#NULL!	4
0	10	1	2	30.3461	0	0	0	0	0	#NULL!	#NULL!	#NULL!	1	0	0	#NULL!	3
1	10	0	2	30.3461	0	0	0	0	0	#NULL!	#NULL!	#NULL!	1	0	0	#NULL!	4
1	10	0	2	30.3673	0	0	0	0	0	#NULL!	#NULL!	#NULL!	1	0	0	#NULL!	4
1	8	1	4	30.3871	0	0	0	0	0	#NULL!	#NULL!	#NULL!	1	0	0	#NULL!	2
0	7	0	2	30.4134	1	0	0	0	1	0	2	2	0	0	0	#NULL!	1
1	10	0	2	30.4218	0	0	0	0	0	#NULL!	#NULL!	#NULL!	1	0	0	#NULL!	4
0	9	0	2	30.4367	0	0	0	0	0	#NULL!	#NULL!	#NULL!	1	0	0	#NULL!	4
1	7	0	2	30.4498	0	0	0	0	0	#NULL!	#NULL!	#NULL!	1	0	0	#NULL!	4
0	7	0	2	30.4705	0	0	0	0	0	#NULL!	#NULL!	#NULL!	1	0	0	#NULL!	4
0	11	0	2	30.4834	0	0	0	0	0	#NULL!	#NULL!	#NULL!	1	0	0	#NULL!	4
1	6	0	3	30.4915	0	0	0	0	0	#NULL!	#NULL!	#NULL!	1	0	0	#NULL!	2
1	10	0	2	30.5241	0	0	0	0	0	0	#NULL!	#NULL!	1	0	0	#NULL!	4
1	4	0	1	30.6689	0	0	0	0	0	#NULL!	#NULL!	#NULL!	1	0	0	#NULL!	1
0	8	0	2	30.6689	0	0	0	0	0	#NULL!	#NULL!	#NULL!	1	0	0	#NULL!	4
1	9	0	2	30.6793	0	0	0	0	0	#NULL!	#NULL!	#NULL!	1	0	0	#NULL!	4
0	11	0	2	30.7787	0	0	0	0	0	#NULL!	#NULL!	#NULL!	1	0	0	#NULL!	4
1	6	0	1	30.7934	0	0	0	0	0	#NULL!	#NULL!	#NULL!	1	0	1	#NULL!	4
0	8	0	2	30.8248	0	0	0	0	0	#NULL!	#NULL!	#NULL!	1	0	0	#NULL!	4
0	9	0	2	30.863	0	0	0	0	0	#NULL!	#NULL!	#NULL!	1	0	0	#NULL!	4
1	8	1	#NULL!	30.8642	0	0	0	0	0	#NULL!	#NULL!	#NULL!	1	0	0	#NULL!	4
1	10	1	2	30.8642	0	0	0	0	0	#NULL!	#NULL!	#NULL!	1	0	0	#NULL!	4
1	11	0	3	30.8642	0	0	1	0	1	0	1	2	0	0	0	#NULL!	2
1	9	0	3	30.9617	0	0	0	0	0	#NULL!	#NULL!	#NULL!	1	0	0	#NULL!	2
1	7	0	3	31.0979	0	0	0	0	0	#NULL!	#NULL!	#NULL!	1	0	0	#NULL!	2
0	12	0	2	31.1419	0	0	0	0	0	#NULL!	#NULL!	#NULL!	1	0	0	#NULL!	4
0	9	1	3	31.1419	0	0	0	0	0	#NULL!	#NULL!	#NULL!	1	0	0	#NULL!	1
0	4	0	2	31.2213	0	0	0	0	0	#NULL!	#NULL!	#NULL!	1	0	0	#NULL!	3
0	8	0	1	31.2213	0	0	0	0	0	#NULL!	#NULL!	#NULL!	1	0	0	#NULL!	4
0	8	0	3	31.2314	0	0	0	0	0	#NULL!	#NULL!	#NULL!	1	0	0	#NULL!	2
0	11	0	3	31.2314	0	0	0	0	0	#NULL!	#NULL!	#NULL!	1	0	0	#NULL!	4
1	11	0	2	31.2461	0	0	0	0	0	#NULL!	#NULL!	#NULL!	1	0	0	#NULL!	4
0	13	0	2	31.2488	0	0	0	0	0	#NULL!	#NULL!	#NULL!	1	0	0	#NULL!	4
1	11	0	2	31.3091	0	0	0	0	0	#NULL!	#NULL!	#NULL!	1	0	0	#NULL!	4
1	5	0	3	31.4077	0	0	1	0	1	0	1	1	0	0	0	#NULL!	2
0	10	0	2	31.4359	0	0	0	0	0	#NULL!	#NULL!	#NULL!	1	0	0	#NULL!	4
1	11	0	3	31.4815	0	0	0	0	0	#NULL!	#NULL!	#NULL!	1	0	0	#NULL!	2
1	10	0	3	31.4879	0	0	0	0	0	#NULL!	#NULL!	#NULL!	1	0	0	#NULL!	4
1	11	0	2	31.5617	0	0	0	0	0	#NULL!	#NULL!	#NULL!	1	0	0	#NULL!	1
0	7	0	2	31.6346	0	0	0	0	0	#NULL!	#NULL!	#NULL!	1	0	0	#NULL!	4
1	12	0	#NULL!	31.6374	0	0	0	0	0	0	#NULL!	#NULL!	1	0	0	#NULL!	4
1	6	0	2	31.6885	0	0	0	0	0	#NULL!	#NULL!	#NULL!	1	0	0	#NULL!	4
1	8	0	3	31.7083	1	0	1	0	1	0	1	1	0	0	0	#NULL!	2
0	11	0	3	31.8616	0	0	0	0	0	#NULL!	#NULL!	#NULL!	1	0	0	#NULL!	1
1	9	0	2	31.8998	0	0	0	0	0	#NULL!	#NULL!	#NULL!	1	0	0	#NULL!	4
0	10	0	3	31.9122	1	1	1	0	1	0	1	1	0	0	0	#NULL!	2
1	6	0	#NULL!	32.001	0	0	0	0	0	#NULL!	#NULL!	#NULL!	1	0	0	#NULL!	4
1	6	0	3	32.0988	0	0	0	0	0	0	#NULL!	#NULL!	1	0	0	#NULL!	2
1	11	0	2	32.1402	0	0	0	0	0	#NULL!	#NULL!	#NULL!	1	0	0	#NULL!	4
1	5	0	3	32.1463	1	0	1	0	1	0	2	2	0	0	0	#NULL!	2
0	9	0	2	32.3232	0	0	0	0	0	#NULL!	#NULL!	#NULL!	1	0	0	#NULL!	4
0	6	0	2	32.3232	1	0	0	0	1	1	0	1	0	0	0	#NULL!	4
0	7	0	2	32.3884	0	0	0	0	0	#NULL!	#NULL!	#NULL!	1	0	0	#NULL!	3
1	10	0	2	32.4074	0	0	0	0	0	2	#NULL!	#NULL!	1	0	0	#NULL!	4
0	12	0	2	32.4467	0	0	0	0	0	#NULL!	#NULL!	#NULL!	1	0	0	#NULL!	4
1	8	0	2	32.4898	0	0	0	0	0	#NULL!	#NULL!	#NULL!	1	0	0	#NULL!	1
1	11	0	2	32.548	0	0	0	0	0	#NULL!	#NULL!	#NULL!	1	0	0	#NULL!	4
1	12	0	3	32.7705	0	0	0	0	0	1	1	3	0	0	0	#NULL!	2
1	11	0	2	32.7859	0	0	0	0	0	#NULL!	#NULL!	#NULL!	1	0	0	#NULL!	4
0	9	0	2	32.7919	0	0	0	0	0	#NULL!	#NULL!	#NULL!	1	0	0	#NULL!	4
0	4	0	1	32.8125	0	0	0	0	0	#NULL!	#NULL!	#NULL!	1	0	0	#NULL!	4
1	9	0	2	32.8241	0	0	0	0	0	#NULL!	#NULL!	#NULL!	1	0	0	#NULL!	4
1	9	0	3	32.8466	0	0	0	0	0	#NULL!	#NULL!	#NULL!	1	0	0	#NULL!	4
0	9	0	2	33.0783	1	0	0	0	1	1	0	1	0	0	0	#NULL!	4
0	10	0	2	33.1213	0	0	0	0	0	#NULL!	#NULL!	#NULL!	1	0	0	#NULL!	4
0	9	0	2	33.1504	0	0	0	0	0	#NULL!	#NULL!	#NULL!	1	0	0	#NULL!	1
1	10	0	3	33.1722	0	1	1	0	1	0	2	2	0	0	0	#NULL!	2
0	10	0	3	33.2031	0	0	0	0	0	0	#NULL!	#NULL!	1	0	0	#NULL!	2
1	8	0	1	33.2085	0	0	0	0	0	#NULL!	#NULL!	#NULL!	1	0	0	#NULL!	4
1	5	0	2	33.241	0	0	0	0	0	#NULL!	#NULL!	#NULL!	1	0	0	#NULL!	4
0	9	0	2	33.305	0	0	0	0	0	#NULL!	#NULL!	#NULL!	1	0	0	#NULL!	4
1	11	0	2	33.3061	0	0	0	0	0	0	#NULL!	#NULL!	1	0	0	#NULL!	4
1	10	0	2	33.3333	0	0	0	0	0	0	#NULL!	#NULL!	1	0	0	#NULL!	4
1	9	0	2	33.3598	0	0	0	0	0	#NULL!	#NULL!	#NULL!	1	0	0	#NULL!	4
0	10	0	2	33.4252	0	0	0	0	0	#NULL!	#NULL!	#NULL!	1	0	0	#NULL!	4
1	8	1	3	33.642	0	0	1	0	1	0	1	1	0	0	0	#NULL!	2
0	10	0	2	33.6593	0	0	0	0	0	#NULL!	#NULL!	#NULL!	1	0	0	#NULL!	4
0	11	0	2	33.6593	0	0	0	0	0	#NULL!	#NULL!	#NULL!	1	0	0	#NULL!	4
0	8	0	3	33.705	0	0	0	0	0	#NULL!	#NULL!	#NULL!	1	0	0	#NULL!	4
0	9	0	3	33.705	0	0	0	0	0	#NULL!	#NULL!	#NULL!	1	0	0	#NULL!	4
1	9	0	3	33.7477	0	0	0	0	0	#NULL!	#NULL!	#NULL!	1	0	0	#NULL!	2
0	12	0	2	33.7623	0	0	0	0	0	#NULL!	#NULL!	#NULL!	1	0	0	#NULL!	4
0	12	0	2	33.7925	0	0	0	0	0	#NULL!	#NULL!	#NULL!	1	0	0	#NULL!	4
0	6	0	2	33.7925	0	0	0	0	0	#NULL!	#NULL!	#NULL!	1	0	0	#NULL!	4
1	9	0	2	33.8021	0	0	0	0	0	#NULL!	#NULL!	#NULL!	1	0	0	#NULL!	4
1	9	0	2	33.8123	0	0	0	0	0	#NULL!	#NULL!	#NULL!	1	0	0	#NULL!	4
0	7	0	2	33.8168	0	0	0	0	0	#NULL!	#NULL!	#NULL!	1	0	0	#NULL!	4
0	7	0	2	33.8741	0	0	0	0	0	#NULL!	#NULL!	#NULL!	1	0	0	#NULL!	4
1	6	0	2	34.0301	0	0	0	0	0	#NULL!	#NULL!	#NULL!	1	0	0	#NULL!	4
1	7	0	3	34.1528	0	0	0	0	0	#NULL!	#NULL!	#NULL!	1	0	0	#NULL!	4
1	9	0	2	34.1536	0	0	0	0	0	#NULL!	#NULL!	#NULL!	1	0	0	#NULL!	4
0	8	0	2	34.1598	0	0	0	0	0	#NULL!	#NULL!	#NULL!	1	0	0	#NULL!	4
0	11	0	2	34.2058	0	0	0	0	0	#NULL!	#NULL!	#NULL!	1	0	0	#NULL!	3
1	6	0	3	34.2593	0	0	0	0	0	#NULL!	#NULL!	#NULL!	1	0	0	#NULL!	2
1	10	0	2	34.3125	0	0	0	0	0	#NULL!	#NULL!	#NULL!	1	0	0	#NULL!	4
1	9	0	2	34.331	0	0	0	0	0	#NULL!	#NULL!	#NULL!	1	0	0	#NULL!	4
0	4	0	2	34.5679	0	0	0	0	0	0	#NULL!	#NULL!	1	0	0	#NULL!	1
0	10	0	3	34.5776	0	0	0	0	0	#NULL!	#NULL!	#NULL!	1	0	0	#NULL!	2
0	9	0	2	34.5776	0	0	0	0	0	#NULL!	#NULL!	#NULL!	1	0	0	#NULL!	3
0	10	0	3	34.6746	0	0	0	0	0	#NULL!	#NULL!	#NULL!	1	0	0	#NULL!	3
1	6	0	3	34.718	0	0	0	0	0	0	#NULL!	#NULL!	1	0	0	#NULL!	2
1	2	0	3	34.8126	0	0	0	0	0	#NULL!	#NULL!	#NULL!	1	0	0	#NULL!	1
0	12	0	3	35.0032	0	0	0	0	0	#NULL!	#NULL!	#NULL!	1	0	0	#NULL!	2
0	10	0	2	35.0032	0	0	0	0	0	#NULL!	#NULL!	#NULL!	1	0	0	#NULL!	4
1	5	0	2	35.0621	0	0	0	0	0	#NULL!	#NULL!	#NULL!	1	0	0	#NULL!	1
1	9	0	3	35.1489	0	0	0	0	0	#NULL!	#NULL!	#NULL!	1	0	0	#NULL!	2
1	9	0	3	35.1562	0	0	1	0	1	0	1	1	0	0	0	#NULL!	2
0	10	0	2	35.1885	0	0	0	0	0	#NULL!	#NULL!	#NULL!	1	0	0	#NULL!	4
0	12	0	3	35.2508	0	0	0	0	0	#NULL!	#NULL!	#NULL!	1	0	0	#NULL!	4
0	9	0	2	35.3212	0	0	0	0	0	#NULL!	#NULL!	#NULL!	1	0	0	#NULL!	3
0	8	0	2	35.6054	0	0	0	0	0	#NULL!	#NULL!	#NULL!	1	0	0	#NULL!	4
0	12	0	3	35.693	0	0	0	0	0	#NULL!	#NULL!	#NULL!	1	0	0	#NULL!	1
0	10	0	2	35.7495	0	0	0	0	0	#NULL!	#NULL!	#NULL!	1	0	0	#NULL!	4
0	8	0	2	35.8564	0	0	0	0	0	#NULL!	#NULL!	#NULL!	1	0	0	#NULL!	1
0	12	0	3	35.9862	0	0	1	0	1	0	1	2	0	0	0	#NULL!	2
0	9	0	2	36.1323	0	0	0	0	0	#NULL!	#NULL!	#NULL!	1	0	0	#NULL!	4
1	10	0	3	36.157	0	0	1	0	1	0	1	1	0	0	0	#NULL!	2
0	6	0	2	36.2897	0	0	0	0	0	#NULL!	#NULL!	#NULL!	1	0	0	#NULL!	4
0	9	0	2	36.3636	0	0	0	0	0	#NULL!	#NULL!	#NULL!	1	0	0	#NULL!	4
0	11	0	3	36.7187	0	0	0	0	0	#NULL!	#NULL!	#NULL!	1	0	0	#NULL!	4
0	9	0	3	37.0242	0	0	0	0	0	#NULL!	#NULL!	#NULL!	1	0	0	#NULL!	3
1	11	0	2	37.0878	0	0	0	0	0	#NULL!	#NULL!	#NULL!	1	0	0	#NULL!	4
0	11	0	2	37.3702	0	0	0	0	0	#NULL!	#NULL!	#NULL!	1	0	0	#NULL!	4
1	10	0	2	37.4351	0	0	0	0	0	#NULL!	#NULL!	#NULL!	1	0	0	#NULL!	4
0	13	0	2	37.4656	0	0	0	0	0	#NULL!	#NULL!	#NULL!	1	0	0	#NULL!	4
0	9	0	2	37.6184	0	0	0	0	0	#NULL!	#NULL!	#NULL!	1	0	0	#NULL!	4
0	11	0	3	37.7229	0	0	0	0	0	#NULL!	#NULL!	#NULL!	1	0	0	#NULL!	1
0	9	0	2	38.4554	0	0	0	0	0	#NULL!	#NULL!	#NULL!	1	0	0	#NULL!	4
0	11	0	3	38.485	0	0	0	0	0	#NULL!	#NULL!	#NULL!	1	0	0	#NULL!	4
0	9	0	3	38.7397	0	0	0	0	0	#NULL!	#NULL!	#NULL!	1	0	1	#NULL!	3
1	8	0	2	39.0125	0	0	0	0	0	#NULL!	#NULL!	#NULL!	1	0	0	#NULL!	1
0	10	0	3	39.2143	0	0	0	0	0	#NULL!	#NULL!	#NULL!	1	0	0	#NULL!	4
0	8	0	2	39.3283	0	0	0	0	0	#NULL!	#NULL!	#NULL!	1	0	0	#NULL!	4
0	7	0	1	39.3503	0	0	0	0	0	#NULL!	#NULL!	#NULL!	1	0	0	#NULL!	3
0	6	0	2	39.5644	0	0	0	0	0	#NULL!	#NULL!	#NULL!	1	0	0	#NULL!	4
0	9	0	2	39.6694	0	0	0	0	0	#NULL!	#NULL!	#NULL!	1	0	0	#NULL!	4
0	9	0	3	40.2816	0	0	0	0	0	#NULL!	#NULL!	#NULL!	1	0	0	#NULL!	4
0	6	0	2	41.2793	0	0	0	0	0	#NULL!	#NULL!	#NULL!	1	0	0	#NULL!	3
0	12	0	3	42.2406	0	0	0	0	0	#NULL!	#NULL!	#NULL!	1	0	0	#NULL!	1
1	3	0	2	43.9446	0	0	0	0	0	#NULL!	#NULL!	#NULL!	1	0	0	#NULL!	1
0	6	0	2	45.4887	0	0	0	0	0	#NULL!	#NULL!	#NULL!	1	0	0	#NULL!	4
0	5	0	2	46.0937	0	0	0	0	0	#NULL!	#NULL!	#NULL!	1	0	0	#NULL!	1
0	6	0	2	46.2222	0	0	0	0	0	#NULL!	#NULL!	#NULL!	1	0	0	#NULL!	3
1	8	0	3	48.0143	0	0	0	0	0	#NULL!	#NULL!	#NULL!	1	0	0	#NULL!	2
1	12	0	3	30.8845	0	1	1	0	1	0	2	3	0	1	0	#NULL!	2
1	8	0	2	31.0204	0	0	1	0	1	1	2	3	0	1	0	#NULL!	1
1	1	0	2	32.4074	1	1	0	0	1	3	1	4	0	1	0	#NULL!	1
1	13	1	3	37.7163	0	1	0	0	1	1	2	4	0	1	0	#NULL!	1
1	14	1	4	#NULL!	#NULL!	1	#NULL!	1	1	2	1	4	0	1	0	#NULL!	4
0	6	1	4	15.0474	1	0	0	0	1	3	2	5	0	1	0	#NULL!	1
1	10	1	3	18.7191	0	1	0	0	1	3	0	4	0	1	0	#NULL!	4
0	16	1	3	18.8189	0	1	0	0	1	2	0	3	0	1	0	#NULL!	4
0	12	1	3	19.4734	1	1	0	0	1	2	2	5	0	1	0	#NULL!	4
1	13	0	3	25.6612	0	0	0	0	0	#NULL!	#NULL!	#NULL!	1	0	0	#NULL!	2

## Sheet: Labels
Gender	Age_intervals	AcuteSurgery	ASA_Score	BMI	WeightLoss	ReducedDietaryIntake	Severely_ill	Missing_InitialScreening	InitialScreening	ScoreErnaering	ScoreSyk	FinalScreening_Score	Missing_FinalScreening	NutritionalRisk	SSI_within30d	Deep_SSI	MainOrgan_NMSCCSP
Male = 1	1 = 18 to 25 y, thereafter 5 years intervals			m/kg²						Only relevant for those with 1 in InitialScreening	Only relevant for those with 1 in InitialScreening	Score above 2 = at nutritional risk					Grouping of surgery types. The first letter of procedure code according to the classification of the Nordic Medico-Statistical Committee Classification of Surgical Procedures): 1 = abdomen (B, E and J), 2 = coronary arteries (F), 3= genial (L) and 4 = musculoskeletal system (N and Q).
